# Supplementary material for: Cohort profile: the LHIV-Manitoba clinical cohort of people living with HIV in Manitoba, Canada
Source: PubMed Central journal article supplement — BMJ Open. 2020 May 27;10(5):e034259. doi: 10.1136/bmjopen-2019-034259 (PMC7259858; doi:10.1136/bmjopen-2019-034259), 2020-05-27
Supplement: bmjopen-2019-034259.draft_revisions.pdf [file bmjopen-2019-034259.draft_revisions.pdf]

# BMJ Open

BMJ Open is committed to open peer review. As part of this commitment we make the peer review history of every article we publish publicly available.

When an article is published we post the peer reviewers' comments and the authors' responses online. We also post the versions of the paper that were used during peer review. These are the versions that the peer review comments apply to.

The versions of the paper that follow are the versions that were submitted during the peer review process. They are not the versions of record or the final published versions. They should not be cited or distributed as the published version of this manuscript.

BMJ Open is an open access journal and the full, final, typeset and author-corrected version of record of the manuscript is available on our site with no access controls, subscription charges or pay-per-view fees (<http://bmjopen.bmj.com>).

If you have any questions on BMJ Open's open peer review process please email [info.bmjopen@bmj.com](mailto:info.bmjopen@bmj.com)

# BMJ Open

## Cohort Profile: the LHIV-Manitoba clinical cohort of people living with HIV in Manitoba, Canada

|                               |                                                                                                                                                                                                                                                                                                                                                                                                                                                                                                                                                                                                                                                                                                                                                                                                                                                                    |
|-------------------------------|--------------------------------------------------------------------------------------------------------------------------------------------------------------------------------------------------------------------------------------------------------------------------------------------------------------------------------------------------------------------------------------------------------------------------------------------------------------------------------------------------------------------------------------------------------------------------------------------------------------------------------------------------------------------------------------------------------------------------------------------------------------------------------------------------------------------------------------------------------------------|
| Journal:                      | <i>BMJ Open</i>                                                                                                                                                                                                                                                                                                                                                                                                                                                                                                                                                                                                                                                                                                                                                                                                                                                    |
| Manuscript ID                 | bmjopen-2019-034259                                                                                                                                                                                                                                                                                                                                                                                                                                                                                                                                                                                                                                                                                                                                                                                                                                                |
| Article Type:                 | Cohort profile                                                                                                                                                                                                                                                                                                                                                                                                                                                                                                                                                                                                                                                                                                                                                                                                                                                     |
| Date Submitted by the Author: | 12-Sep-2019                                                                                                                                                                                                                                                                                                                                                                                                                                                                                                                                                                                                                                                                                                                                                                                                                                                        |
| Complete List of Authors:     | McClarty, Leigh; University of Manitoba, Centre for Global Public Health, Department of Community Health Sciences<br>Cheuk, Eve; University of Manitoba, Centre for Global Public Health, Department of Community Health Sciences<br>Ireland, Laurie; Nine Circles Community Health Centre<br>Kendall, Claire; Elisabeth Bruyere Research Institute<br>Bibeau, Christine; Community Scholar<br>Loeppky, Carla; Government of Manitoba, Health, Seniors & Active Living<br>Kasper, Ken; University of Manitoba, Internal Medicine<br>Keynan, Yoav; University of Manitoba, Medical Microbiology and Infectious Diseases<br>Blanchard, James; University of Manitoba, Centre for Global Public Health, Department of Community Health Sciences<br>Becker, Marissa ; University of Manitoba, Centre for Global Public Health, Department of Community Health Sciences |
| Keywords:                     | HIV & AIDS < INFECTIOUS DISEASES, Epidemiology < INFECTIOUS DISEASES, Public health < INFECTIOUS DISEASES                                                                                                                                                                                                                                                                                                                                                                                                                                                                                                                                                                                                                                                                                                                                                          |
|                               |                                                                                                                                                                                                                                                                                                                                                                                                                                                                                                                                                                                                                                                                                                                                                                                                                                                                    |

SCHOLARONE™  
Manuscripts

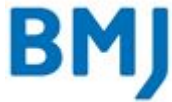

I, the Submitting Author has the right to grant and does grant on behalf of all authors of the Work (as defined in the below author licence), an exclusive licence and/or a non-exclusive licence for contributions from authors who are: i) UK Crown employees; ii) where BMJ has agreed a CC-BY licence shall apply, and/or iii) in accordance with the terms applicable for US Federal Government officers or employees acting as part of their official duties; on a worldwide, perpetual, irrevocable, royalty-free basis to BMJ Publishing Group Ltd ("BMJ") its licensees and where the relevant Journal is co-owned by BMJ to the co-owners of the Journal, to publish the Work in this journal and any other BMJ products and to exploit all rights, as set out in our [licence](#).

The Submitting Author accepts and understands that any supply made under these terms is made by BMJ to the Submitting Author unless you are acting as an employee on behalf of your employer or a postgraduate student of an affiliated institution which is paying any applicable article publishing charge ("APC") for Open Access articles. Where the Submitting Author wishes to make the Work available on an Open Access basis (and intends to pay the relevant APC), the terms of reuse of such Open Access shall be governed by a Creative Commons licence – details of these licences and which [Creative Commons](#) licence will apply to this Work are set out in our licence referred to above.

Other than as permitted in any relevant BMJ Author's Self Archiving Policies, I confirm this Work has not been accepted for publication elsewhere, is not being considered for publication elsewhere and does not duplicate material already published. I confirm all authors consent to publication of this Work and authorise the granting of this licence.

1  
2  
3 **Cohort Profile: the LHIV-Manitoba clinical cohort of people living with HIV in Manitoba,**  
4 **Canada**  
5

6 **AUTHORS**

7 Leigh M. McClarty, corresponding author

8 Centre for Global Public Health

9 R065 Medical Rehabilitation Building – 771 McDermot Ave.

10 University of Manitoba

11 Winnipeg, Manitoba R3E0T6

12 Canada

13 leigh.mcclarty@umanitoba.ca

14  
15  
16  
17 Eve Cheuk, eve.cheuk@gmail.com

18  
19 Laurie Ireland, lireland@ninecircles.ca

20  
21 Claire E. Kendall, ckendall@mail.uottawa.ca

22  
23 Christine Bibeau, christine.bibeau@yahoo.com

24  
25  
26 Carla Loeppky, carla.loeppky@gov.mb.ca

27  
28 Ken Kasper, kkasper@hsc.mb.ca

29  
30 Yoav Keynan, yoav.keynan@umanitoba.ca

31  
32 James F. Blanchard, james\_blanchard@umanitoba.ca

33  
34  
35 Marissa L. Becker, marissa.becker@umanitoba.ca  
36  
37  
38  
39  
40  
41  
42  
43  
44  
45  
46  
47  
48  
49  
50  
51  
52  
53  
54  
55  
56  
57  
58  
59  
60

## ABSTRACT

**Purpose:** The LHIV-Manitoba cohort was developed as a way to provide a comprehensive source of HIV-related health information in the central Canadian Prairie province of Manitoba. The cohort will provide important information as we aim to better understand local HIV epidemiology and address key knowledge and practice gaps in HIV prevention, treatment, and care programming in the province.

**Participants:** In total, 890 individuals, aged 18 or older and living or receiving HIV care in Manitoba are enrolled in the cohort. A complete clinical dataset exists for 725 participants, which includes variables on socio-demographic characteristics, comorbidities and co-infections, self-reported HIV exposure categories, and HIV clinical indicators. A limited clinical dataset exists for an additional 165 individuals who were enrolled posthumously. 97.5% of cohort participants' clinical records are linked to provincial administrative health datasets.

**Findings to date:** The average age of cohort participants is 49.7 years. Approximately three-quarters of participants are male, 42% self-identified as white and 42% as Indigenous. The majority of participants (64%) reported condomless vaginal sex as a risk exposure for HIV. Nearly one-fifth (18%) of participants have an active HCV infection and the cohort's median CD4 count increased from 316 to 518 cells/mm<sup>3</sup> between time of entry into care to end of the first quarter in 2019.

**Future plans:** The LHIV-Manitoba cohort is an open cohort, and as such, participant enrolment, data collection, and analyses will be continually ongoing. Future analyses will focus on the impact of provincial drug plans on clinical outcomes, determinants of mortality among cohort participants, and deriving estimates for a local HIV care cascade.

## STRENGTHS AND LIMITATIONS OF THIS STUDY

- This cohort is the first comprehensive source of health data compiled from people living with HIV in Manitoba and will provide important opportunities for understanding clinical care needs, gaps, and outcomes of people living with HIV in the province.
- Cohort enrolment protocols are clinic-based, and as such, this cohort may not be representative of people living with HIV who are sub-optimally engaged in care. One key strategy to circumvent the misinterpretation of analyses derived from cohort data will be to involve Manitoba HIV Program clients and their providers in the analysis, interpretation, and knowledge translation processes.
- Because this cohort is embedded within the Manitoba HIV Program, and stakeholders within government and the community of people with lived experience are actively involved in its development, data from the cohort will be able to facilitate analyses to inform programming and provincial policy on adequately resourcing HIV-related health services.

**Word count:** 2,652

## INTRODUCTION

Annual reports on HIV in Canada consistently highlight heterogeneous, albeit relatively stable, epidemiological trends across the country.<sup>1</sup> At the end of 2016, the Public Health Agency of Canada (PHAC) estimated that 63,110 people were living with HIV in the country and 2,402 people were newly diagnosed in 2017.<sup>1</sup> Nationally, new HIV diagnoses disproportionately occur among Indigenous (First Nations, Inuit, and Métis) populations and people who have immigrated from countries where HIV is endemic.<sup>1</sup> The greatest proportion of prevalent HIV infections in nearly all Canadian provinces are attributed to condomless sex between men; however, notable exceptions include the central Prairie provinces of Saskatchewan and Manitoba, where most incident and prevalent cases are attributable to injection drug use and heterosexual transmission, respectively.<sup>2-4</sup> Rates of new HIV diagnoses per 100,000 population in Manitoba have been consistently higher than the national average, ranging from 9.5 new diagnoses in 2014 to 6.6 in 2016 and 2017.<sup>1 4 5</sup> Despite evidence of unique epidemiology and disproportionately high rates of infection, relatively little research addresses HIV epidemiology in the Canadian Prairies,<sup>6</sup> and there is a specific lack of published research focusing on Manitoba.

Current HIV epidemiological data for Manitoba are primarily derived from surveillance reports produced by PHAC and the provincial health department, Manitoba Health, Seniors and Active Living (MSHAL).<sup>1 2</sup> In 2017, MHSAL reported 89 new cases of HIV in the province with the majority of cases occurring in Winnipeg (81%) and a disproportionately high incidence among women when compared to national rates.<sup>2</sup> While useful for providing basic information about patterns and trends in HIV infection in Manitoba, these reports only provide aggregate-level demographic- and geographic analyses of the previous year's incident infections (new diagnoses and/or cases introduced to, but not acquired in, the province). Without clinical data, these reports are limited in their ability to inform specific research questions or programmatic decisions for HIV care and service delivery in the province.

In 2013, as part of a Canadian Institutes of Health Research-funded program of research, the “Advancing Primary Health Care for Persons Living with HIV in Canada” (LHIV) study provided support for the establishment of a prospective clinical cohort of people living with HIV in Manitoba. This clinical cohort is the first comprehensive source of HIV-specific health data in Manitoba and provides important opportunities to address key knowledge gaps in local HIV epidemiology—including patterns of healthcare utilisation and relevant clinical outcomes—and to understand healthcare needs of people living with HIV in the province. Similar cohorts have been developed and are now well-established in other Canadian provinces, including British Columbia<sup>7</sup> and Ontario.<sup>8</sup> This article provides an overview of processes and procedures involved in cohort development and maintenance, and describes demographic- and HIV-related characteristics of LHIV-Manitoba cohort participants.

## COHORT DESCRIPTION

### Study setting

Established in 2007, the Manitoba HIV Program is the primary provider of treatment, care, and support for people living with HIV in the province. The Manitoba HIV Program employs a multidisciplinary care model in which HIV specialist physicians, family physicians, nurses (including nurse practitioners), pharmacists, dietitians, social workers, and other allied service providers provide comprehensive HIV care out of three clinic sites—a hospital-based outpatient

1  
2  
3 clinic and a community health centre in Manitoba's capital city, Winnipeg, and a nurse-run  
4 health access centre in Brandon, a semi-urban city approximately 200 kilometres west of  
5 Winnipeg.  
6

7  
8 Although arising from a research project, the LHIV-Manitoba cohort is strategically embedded  
9 within the Manitoba HIV Program and the local study team partners with stakeholders within the  
10 Manitoba HIV Program, MHSAL, and the LHIV study's Community Scholar Program,<sup>9</sup> all of  
11 whom have been actively involved in the development of the cohort. As such, findings from  
12 cohort data are expected to have direct relevance and applicability for both HIV care  
13 programming and provincial health policy.  
14

### 15 16 **Ethical approval**

17 The LHIV-Manitoba cohort study received ethics approval from the University of Manitoba's  
18 Health Research Ethics Board, the local hospital's Research Impact Committee, and the Health  
19 Information Privacy Committee (HIPC) of MHSAL. This work has also received support from  
20 the Health Information Research Governance Committee of *Nanaandawewigamig*, the First  
21 Nations Health and Social Secretariat of Manitoba.  
22

### 23 24 **Enrolment procedures**

25 Recruitment began at one clinic site in October 2013 and was fully implemented across all  
26 Manitoba HIV Program sites by January 2014. Data collection, linkage to administrative health  
27 databases, and data cleaning and analyses began in early 2017. Both enrolment and linkage are  
28 ongoing.  
29

30  
31 The enrolment process is illustrated in **Figure 1**. Inclusion criteria for the cohort are broad:  
32 participants must be at least 18 years of age and either living with HIV in Manitoba or receiving  
33 HIV care in Manitoba. Individuals who met these criteria but are under the jurisdiction of the  
34 Public Guardian and Trustee of Manitoba, or were otherwise unable to make decisions pertaining  
35 to their own healthcare, are deemed ineligible for participation in the cohort.  
36

37  
38 Recruitment and informed consent procedures take place within the Manitoba HIV Program  
39 clinics; clients who present to clinic are approached by a nurse or another allied healthcare  
40 provider and asked whether they are willing to speak to a research assistant about participating in  
41 a research project. If a client is agreeable, a research assistant meets with them to explain the  
42 purpose, context, and methods for the LHIV-Manitoba cohort study, and reviews the informed  
43 consent form to determine whether the person is interested, willing, and able to participate.  
44 Participants have the opportunity to take part in any combination of three separate components of  
45 the LHIV-Manitoba cohort: (i) have their clinical data collected; and/or (ii) have their clinical  
46 data linked to administrative health data that is routinely collected by the province; and/or (iii)  
47 indicate interest in being approached about future HIV research studies. Clients who are not  
48 ready to decide immediately can defer their decision to participate in the cohort and request to  
49 meet with the research assistant at a later date to reconsider their participation. Study staff keep  
50 track of individuals who asked to defer their decision to participate and actively follow-up with  
51 them at their next clinic appointment on in a year's time, depending on stated preference.  
52  
53

### 54 55 **Study measures, data sources, and data collection**

56  
57  
58  
59  
60

Clinical data are manually extracted from electronic medical records (EMR)—or from paper charts for data clinical information recorded prior to the introduction of EMR to clinic sites—within the Manitoba HIV Program’s clinic sites by the first author and two trained extractors, and then entered into an encrypted, password protected Excel spreadsheet for consenting participants. A complete clinical dataset for the LHIV-Manitoba cohort includes variables on participants’ socio-demographic characteristics (age, sex, geographic location of residence, self-identified ethnicity), comorbid chronic- and mental health diagnoses, opportunistic- and other co-infections (occurring within 6-months of presentation to HIV care), including Hepatitis C virus (HCV); recorded HIV exposure categories; date and geographic location of first positive HIV test; CD4 count at time of diagnosis, at time of antiretroviral therapy (ART) initiation, and at the end of the second and fourth quarters of each year, beginning in 2017; date of first ART initiation; current ART regimen (collected biannually, beginning in 2017); alcohol and drug use, including injection drug use; and type of prescription pharmaceutical insurance coverage (collected biannually, beginning in 2017).

The study’s institutional ethics approvals also allow data from deceased clients of the Manitoba HIV Program to be collected via retrospective chart reviews. A limited dataset is extracted from clinical records of deceased individuals, which comprises a subset of the aforementioned clinical datasets, excluding all comorbidity and co-infection data from clinical records, except for HCV; treatment regimen data; and prescription pharmaceutical insurance data.

For deceased clients and participants who provide consent to data linkage, anonymized, de-identified clinical data are linked to provincial administrative health databases housed at MHSAL. Manitoba’s administrative health datasets include individual-level records for nearly all contacts with the provincial healthcare system, including physician visits, hospital admissions, pharmaceutical prescription dispensations, and laboratory testing.<sup>10</sup> Linkage between clinical and administrative datasets is done through matching an individual’s unique Personal Health Identification Number (PHIN) within both datasets. Before linked datasets are returned to the study team, MHSAL scrambles PHINs to de-identify the datasets and maintain participant anonymity.<sup>11</sup>

### Characteristics of study participants

As of March 31<sup>st</sup>, 2019, 890 unique individuals are included in the cohort (Figure 1). A complete clinical dataset exists for 725 (81.5%) cohort participants who agreed to have their data reviewed and extracted from clinical records within the Manitoba HIV Program. A limited clinical dataset exists for an additional 165 individuals whose clinical records were reviewed posthumously. Nearly all individual-level clinical data are also linked to provincial administrative health datasets ( $n=868$ , 97.5%). At the end of the first quarter of 2019, 676 cohort participants (76.0%) were alive and 214 (24.0%) were deceased.

Select sociodemographic characteristics and outcomes of cohort participants are presented in **Table 1** and compared to the larger Manitoba HIV Program client population. The average age of cohort participants at the end of the first quarter of 2019 (or at time of death, for participants who were deceased by March 31<sup>st</sup>, 2019), was  $49.7 \pm 11.9$  years. The majority of cohort participants are male (71.2%), over 80% reported being either white (42.4%) or Indigenous (41.6%), while an additional 10.9% self-identified as an ethnicity categorized as



1  
2  
3 African/Caribbean/black. Geographic distribution of cohort participants is primarily concentrated  
4 in Winnipeg (80.8%), while 1.4% of cohort participants live outside of Manitoba.  
5

## 6 7 **FINDINGS TO DATE**

8 Analyses from the LHIV-Manitoba cohort are ongoing; a summary of preliminary findings is  
9 provided below.  
10

### 11 **Representativeness and distribution of key outcomes within the LHIV-Manitoba cohort**

12 Given the research and programmatic potential of this cohort, it is of particular interest to  
13 understand whether, and to what extent, the demographic profile of cohort participants is  
14 representative of the larger Manitoba HIV Program client population (Table 1). Although similar  
15 in age structure, compared to the Manitoba HIV Program's client population, cohort participants  
16 are significantly more likely to be  $\geq 40$  years (78.9% vs. 70.0%,  $p < 0.05$ ). Compared to the  
17 Manitoba HIV Program, the cohort includes significantly more men (71.2% vs. 64.7%;  $p = 0.001$ )  
18 and individuals who self-identify as white (42.3% vs. 30.0%,  $p < 0.001$ ) or Indigenous (41.5% vs.  
19 33.0%,  $p < 0.001$ ) are greater in the LHIV-Manitoba cohort, while African/Caribbean/black  
20 clients are underrepresented (10.9% vs. 15.8%,  $p < 0.001$ ). The geographic distribution of cohort  
21 participants is similar to that of the larger client population, with the large majority of  
22 participants residing in Winnipeg (80.8% vs. 79.6%,  $p = 0.486$ ).  
23  
24  
25

### 26 **HIV-specific clinical indicators, co-infections, and comorbidities**

27 Select clinical indicators, analysed by sex, are presented in **Table 2**. Preliminary findings from  
28 cohort participants' clinical data highlight similar trends to those seen in the most recent  
29 Manitoba HIV Program annual reports.<sup>12 13</sup> While a substantial proportion of cohort participants  
30 presented late to HIV care, with 57.0% having initial CD4 counts  $\leq 350$  cells/mm<sup>3</sup>, 52.3% of  
31 most recent CD4 counts are  $> 500$  cells/mm<sup>3</sup>. In general, the proportion of participants with  
32 suppressed viral loads ( $< 200$  HIV RNA copies/mL) increased from their initial to most recent  
33 clinic visit (50.5% to 83.2%, respectively). Female cohort participants were significantly more  
34 likely than male participants to have unsuppressed viral loads (i.e.  $> 200$  copies/mL) at  
35 presentation to care, but this same difference was not seen when analysing most recent viral load  
36 results. Opportunistic infections (OIs) were diagnosed at or within 6-months of presentation to  
37 HIV care among 29.1% of participants who were alive at enrolment, and 6.6% presented to care  
38 with  $\geq 2$  OIs. Prevalence of active HCV co-infection at enrolment is 17.5% among all  
39 participants, and slightly higher among female than male participants (19.9% vs. 16.6%). Two-  
40 fifths of participants had at least one comorbidity recorded in their clinical records, and 12.8%  
41 ( $n = 93$ ) were living with at least two.  
42  
43  
44  
45

### 46 **HIV exposures among cohort participants**

47 **Table 3** presents all HIV exposure categories recorded in participants' clinical files, analysed by  
48 sex. Although data in Table 3 are organized according to an HIV "risk hierarchy",<sup>14</sup> we report  
49 multiple exposure categories per individual in order to capture some of the complexity that can  
50 be missed with conventional hierarchy frameworks.<sup>15</sup> Notably, 41.0% of female participants  
51 reported at least two possible HIV exposure categories, while 29.6% of men reported the same.  
52 Similar to trends from annual surveillance reports in Manitoba,<sup>2 12 13 16</sup> condomless vaginal sex is  
53 the most commonly identified exposure category. Nearly half of male participants (47.6%)  
54 reported condomless anal sex with other men as a possible exposure, and 4.4% reported both  
55  
56  
57  
58  
59  
60

1  
2  
3 condomless anal sex with men and injection drug use. The majority of female participants  
4 (92.6%) reported condomless vaginal sex as a possible exposure, and 26.2% reported injection  
5 drug use.  
6

## 7 **STRENGTHS AND LIMITATIONS**

8 Key limitations and challenges experienced throughout the development of the LHIV-Manitoba  
9 cohort, and the particular challenges associated with developing clinical cohorts using research  
10 dollars, have been described in detail elsewhere.<sup>17</sup> Briefly, a number participants expressed  
11 apprehension about the kinds of data that would be collected as a result of their involvement with  
12 the cohort, and in response, study staff made a point to spend adequate time to clearly explain the  
13 processes through which the study is able to link clinical and administrative data while  
14 maintaining confidentiality. Additionally, efficiently implementing study protocols without  
15 disrupting existing clinic operations was another substantial challenge; incorporating additional  
16 procedures related to cohort enrolment into routine encounters was difficult for healthcare  
17 providers who are working within busy HIV clinics. The study team regularly engages with  
18 providers to highlight the benefits that the cohort may confer to their own practice, their clients'  
19 needs, and the operations of Manitoba HIV Program.  
20  
21  
22  
23

24 Because enrolment protocols are clinic-based, this cohort may not be representative of people  
25 living with HIV who are sub-optimally engaged in care. As enrolment efforts move forward, it  
26 will be important for the study team to consider strategies to increase the proportion of  
27 participants belonging to demographic subgroups who are currently underrepresented in the  
28 cohort. It is of particular interest to the study team to understand whether certain subgroups are  
29 less likely to consent to cohort participation, and if so why. While findings from the cohort will  
30 still be important for informing care programming and policy decisions for the province,  
31 generalizability may be limited, and results must be interpreted accordingly. One key strategy to  
32 circumvent the misinterpretation of analyses derived from cohort data will be to involve  
33 Manitoba HIV Program clients and their providers in the analysis, interpretation, and knowledge  
34 translation processes.  
35  
36

37 The LHIV-Manitoba cohort is the first comprehensive source of health data compiled from  
38 people living with HIV in the province and will provide important opportunities for  
39 systematically and comprehensively understanding clinical care needs, gaps, and outcomes of  
40 Manitobans living with HIV. Importantly, Manitoba is well-positioned to undertake large,  
41 population-based linkage studies given the existence of a single insurer (MHSAL) that is  
42 responsible for payment of most health services, and the existence of linkable, population-based  
43 administrative health databases through the Manitoba Centre for Health Policy.<sup>18 19</sup> The cohort  
44 also identifies common comorbidities such as diabetes and hypertension where further  
45 assessment of outcomes offers opportunities for targeted resource allocation for improved  
46 management.  
47  
48  
49

50 Because the clinical cohort is embedded within the Manitoba HIV Program, and stakeholders  
51 within MHSAL and the community of people with lived experience have been actively involved  
52 in its development, we also expect that data from the cohort will facilitate epidemiological  
53 analyses that can inform both HIV care programming and provincial policy on adequately  
54 resourcing HIV-related health services. As such, future analyses will focus on the impact of  
55  
56  
57  
58  
59

1  
2  
3 provincial drug plans on clinical outcomes and determinants of mortality among cohort  
4 participants. Additionally, cohort data will be used to generate Manitoba-specific HIV care  
5 cascade estimates<sup>20-22</sup> and examine the cascade through an equity lens to understand how  
6 different groups of participants experience HIV care and treatment outcomes differently.  
7

8  
9 Finally, the Manitoba HIV Program embodies a unique care model—comprising both specialist  
10 and primary care services—that closely aligns with the Patient Centered Medical Home (PCMH)  
11 model of HIV care.<sup>23</sup> As such, findings from the LHIV-Manitoba cohort will be able to speak to  
12 the growing body of literature focusing on holistic models of HIV care delivery.<sup>23 24</sup>  
13  
14  
15  
16  
17  
18  
19  
20  
21  
22  
23  
24  
25  
26  
27  
28  
29  
30  
31  
32  
33  
34  
35  
36  
37  
38  
39  
40  
41  
42  
43  
44  
45  
46  
47  
48  
49  
50  
51  
52  
53  
54  
55  
56  
57  
58  
59  
60

**Table 1.** Sociodemographic characteristics and key outcomes of LHIV-Manitoba cohort participants, as compared to Manitoba HIV Program client population.

|                                                                       | LHIV-Manitoba cohort<br>(N=890) |      | Manitoba HIV Program<br>(N=1,357) |      | <i>p</i> -value |
|-----------------------------------------------------------------------|---------------------------------|------|-----------------------------------|------|-----------------|
|                                                                       | <i>n</i>                        | %    | <i>n</i>                          | %    |                 |
| <b>Age (years) on March 31<sup>st</sup>, 2019 or at time of death</b> |                                 |      |                                   |      |                 |
| <18                                                                   | 0                               | 0    | 2                                 | 0.2  | 0.245           |
| 18-24                                                                 | 10                              | 1.1  | 46                                | 3.4  | 0.001           |
| 25-39                                                                 | 178                             | 20.0 | 358                               | 26.4 | 0.001           |
| 40-64                                                                 | 621                             | 69.8 | 871                               | 64.2 | 0.006           |
| ≥65                                                                   | 81                              | 9.1  | 78                                | 5.8  | 0.003           |
| Mean (SD)                                                             | 49.7 (11.9)                     |      | 46.8 (12.1)                       |      | 0.000           |
| Median (IQR)                                                          | 49.8 (41.5-57.5)                |      | 46.9 (37.9-55.2)                  |      | 0.000           |
| <b>Sex</b>                                                            |                                 |      |                                   |      |                 |
| Male                                                                  | 634                             | 71.2 | 878                               | 64.7 | 0.001           |
| Female                                                                | 256                             | 28.8 | 478                               | 35.2 | 0.002           |
| <b>Self-identified ethnicity*</b>                                     |                                 |      |                                   |      |                 |
| White                                                                 | 376                             | 42.4 | 407                               | 36.2 | 0.000           |
| Indigenous (First Nations, Inuit, Métis)                              | 369                             | 41.6 | 448                               | 39.9 | 0.000           |
| Sub-Saharan African/Caribbean/black                                   | 97                              | 10.9 | 214                               | 19.1 | 0.001           |
| Other <sup>†</sup>                                                    | 44                              | 5.0  | 54                                | 4.8  | 0.307           |
| <b>Region of residence</b>                                            |                                 |      |                                   |      |                 |
| Winnipeg                                                              | 719                             | 80.8 | 1,080                             | 79.6 | 0.486           |
| Central and Eastern Manitoba                                          | 48                              | 5.4  | 71                                | 5.2  | 0.836           |
| Southern Manitoba                                                     | 37                              | 4.2  | 67                                | 4.9  | 0.440           |
| Western Manitoba                                                      | 35                              | 3.9  | 64                                | 4.7  | 0.365           |
| Northern Manitoba                                                     | 30                              | 3.4  | 46                                | 3.4  | 1.000           |
| Out of province                                                       | 12                              | 1.4  | 21                                | 1.6  | 0.705           |
| Unknown/No known address                                              | 9                               | 1.0  | 8                                 | 0.6  | 0.285           |
| <b>Drug coverage at March 31<sup>st</sup>, 2019<sup>‡</sup></b>       |                                 |      |                                   |      |                 |

|                                                                      |     |      |   |   |   |
|----------------------------------------------------------------------|-----|------|---|---|---|
| Out-of-pocket expenses associated with drug plan                     | 293 | 45.4 | - | - |   |
| No out-of-pocket expenses associated with drug plan                  | 346 | 53.6 | - | - | - |
| Not on treatment/Unknown                                             | 6   | 0.9  | - | - |   |
| <b>Problematic substance use recorded in clinic file<sup>§</sup></b> |     |      |   |   |   |
| Alcohol                                                              | 292 | 40.3 | - | - |   |
| Drugs (prescription or illegal)                                      | 346 | 47.7 | - | - | - |
| Alcohol and drugs                                                    | 217 | 29.9 | - | - |   |
| <b>Has a primary care practitioner<sup>§</sup></b>                   | 627 | 70.5 | - | - | - |

\*Sample sizes may not add up to total participants due to missing data for some variables.

†Includes Latin American, East/Southeast Asian, South Asian, West Asian/North African/Middle Eastern.

‡Variable only collected for participants alive in the fourth quarter of 2018 ( $n=645$ ).

§Variable only collected for participants alive at cohort enrolment ( $n=725$ ).

**Table 2.** HIV-specific and other clinical indicators among LHIV-Manitoba cohort participants, by sex.

|                                                                 | Male*<br>(N=634)      |      | Female*<br>(N=256)  |      | Total*<br>(N=890)     |      | p-value |
|-----------------------------------------------------------------|-----------------------|------|---------------------|------|-----------------------|------|---------|
|                                                                 | n                     | %    | n                   | %    | n                     | %    |         |
| <b>Initial CD4 count in Manitoba (cells/mm<sup>3</sup>)</b>     |                       |      |                     |      |                       |      |         |
| <200                                                            | 211                   | 33.8 | 72                  | 28.7 | 283                   | 32.3 | 0.467   |
| 200-350                                                         | 151                   | 24.2 | 65                  | 25.9 | 216                   | 24.7 |         |
| 351-500                                                         | 117                   | 18.8 | 47                  | 18.7 | 164                   | 18.7 |         |
| >500                                                            | 145                   | 23.2 | 67                  | 26.7 | 212                   | 24.2 |         |
| Mean (SD)                                                       | 328.2 (248.7)         |      | 370.5 (257.1)       |      | 340.3 (251.7)         |      |         |
| Median (IQR)                                                    | 298.5 (116-478.5)     |      | 336 (179-517)       |      | 316 (129-492)         |      |         |
| <b>Last CD4 count, up to end of 2018 (cells/mm<sup>3</sup>)</b> |                       |      |                     |      |                       |      |         |
| <200                                                            | 81                    | 12.8 | 47                  | 18.6 | 128                   | 14.5 | 0.064   |
| 200-350                                                         | 88                    | 14.0 | 38                  | 15.0 | 126                   | 14.3 |         |
| 351-500                                                         | 130                   | 20.6 | 38                  | 15.0 | 168                   | 19.0 |         |
| >500                                                            | 332                   | 52.6 | 130                 | 51.4 | 462                   | 52.3 |         |
| Mean (SD)                                                       | 589.3 (303.6)         |      | 331.7 (302.0)       |      | 542.2 (319.1)         |      |         |
| Median (IQR)                                                    | 565 (384-768)         |      | 256 (99-472)        |      | 517.5 (309.5-735.5)   |      |         |
| <b>Initial viral load (copies/mL)</b>                           |                       |      |                     |      |                       |      |         |
| <200                                                            | 329                   | 54.7 | 100                 | 40.3 | 429                   | 50.5 | 0.001†  |
| 200-999                                                         | 27                    | 4.5  | 16                  | 6.5  | 43                    | 5.1  |         |
| 1,000 – 99,999                                                  | 147                   | 24.5 | 90                  | 36.3 | 237                   | 27.9 |         |
| 100,000 – 999,999                                               | 80                    | 13.3 | 36                  | 14.5 | 116                   | 13.7 |         |
| ≥1,000,000                                                      | 18                    | 3.0  | 6                   | 2.4  | 24                    | 2.8  |         |
| Mean (SD)                                                       | 125,778.7 (523,975.9) |      | 107,972 (340,114.2) |      | 120,577.2 (477,511.4) |      |         |
| Median (IQR)                                                    | 60.9 (0-38,400)       |      | 1,875 (0-40,300)    |      | 170 (0-38,800)        |      |         |
| <b>Last viral load, up to end of 2018 (copies/mL)</b>           |                       |      |                     |      |                       |      |         |
| <200                                                            | 491                   | 84.4 | 190                 | 80.2 | 681                   | 83.2 | 0.517†  |
| 200-999                                                         | 22                    | 3.8  | 9                   | 3.8  | 31                    | 3.8  |         |
| 1,000 – 99,999                                                  | 46                    | 7.9  | 28                  | 11.8 | 74                    | 9.0  |         |

|                                                      |                    |      |                    |      |                      |      |                    |
|------------------------------------------------------|--------------------|------|--------------------|------|----------------------|------|--------------------|
| 100,000 – 999,999                                    | 18                 | 3.1  | 8                  | 3.4  | 26                   | 3.2  |                    |
| ≥1,000,000                                           | 5                  | 0.9  | 2                  | 0.8  | 7                    | 0.9  |                    |
| Mean (SD)                                            | 40,972 (415,359.2) |      | 27,705 (171,693.3) |      | 37,133.2 (362,048.3) |      |                    |
| Median (IQR)                                         | 0 (0-27.9)         |      | 0 (0-54.6)         |      | 0 (0-32.4)           |      |                    |
| <b>Opportunistic infections (OI) ‡§</b>              |                    |      |                    |      |                      |      |                    |
| None                                                 | 364                | 69.9 | 150                | 73.5 | 514                  | 70.9 |                    |
| Oropharyngeal and/or esophageal candidiasis (thrush) | 108                | 20.7 | 39                 | 19.1 | 147                  | 20.3 |                    |
| <i>Pneumocystis jirovecii</i> pneumonia (PJP)        | 56                 | 10.8 | 9                  | 4.4  | 65                   | 9.0  | 0.131 <sup>†</sup> |
| Active tuberculosis                                  | 29                 | 5.6  | 14                 | 6.9  | 43                   | 5.9  |                    |
| <i>Mycobacterium avium-intracellulare</i> (MAI)      | 7                  | 1.3  | 1                  | 0.5  | 8                    | 1.1  |                    |
| Cryptococcal meningitis                              | 4                  | 0.8  | 1                  | 0.5  | 5                    | 0.7  |                    |
| <b>Hepatitis C virus status at cohort enrolment</b>  |                    |      |                    |      |                      |      |                    |
| No infection                                         | 496                | 78.2 | 182                | 71.1 | 678                  | 76.2 |                    |
| Active infection (RNA+)                              | 105                | 16.6 | 51                 | 19.9 | 156                  | 17.5 | 0.085 <sup>†</sup> |
| Past infection (RNA-/Ab+)                            | 32                 | 5.1  | 22                 | 8.6  | 54                   | 6.1  |                    |
| Unknown                                              | 1                  | 0.2  | 1                  | 0.4  | 2                    | 0.2  |                    |
| <b>Comorbidities<sup>‡¶</sup></b>                    |                    |      |                    |      |                      |      |                    |
| None                                                 | 305                | 58.5 | 125                | 61.3 | 430                  | 59.3 |                    |
| Asthma/COPD                                          | 93                 | 17.9 | 36                 | 17.7 | 129                  | 17.8 |                    |
| Hypertension (HTN)                                   | 88                 | 16.9 | 24                 | 11.8 | 112                  | 15.5 | 0.006 <sup>†</sup> |
| Type II diabetes (DM2)                               | 66                 | 12.7 | 39                 | 19.1 | 105                  | 14.5 |                    |
| Chronic kidney disease (CKD)                         | 33                 | 6.3  | 7                  | 3.4  | 40                   | 5.5  |                    |
| Coronary artery disease (CAD)                        | 33                 | 6.3  | 3                  | 1.5  | 36                   | 5.0  |                    |

\*Sample sizes may not add up to total participants due to missing data for some variables.

<sup>†</sup>Some expected values <5, so *p*-values must be interpreted with caution.

<sup>‡</sup>Variable only collected for participants who were alive at cohort enrolment; Male, *n*=521; Female, *n*=204; Total, *n*=725.

<sup>§</sup>Diagnosed at, or within 6-months of presentation to care with the Manitoba HIV Program. Sum of categories exceeds total sample size because some participants presented with ≥1 OI.

<sup>¶</sup>Sum of categories exceeds total sample size because some participants presented with ≥1 comorbidity.

**Table 3.** Self-identified HIV exposure categories among LHIV-Manitoba cohort participants, by sex

|                                                               | Male*      |             | Female*    |             | Total      |             | p-value          |
|---------------------------------------------------------------|------------|-------------|------------|-------------|------------|-------------|------------------|
|                                                               | (N=634)    |             | (N=256)    |             | (N=890)    |             |                  |
|                                                               | n          | %           | n          | %           | n          | %           |                  |
| <b>Condomless anal sex between males + injection drug use</b> | <b>28</b>  | <b>4.4</b>  | -          | -           | <b>28</b>  | <b>3.1</b>  | -                |
| <b>Condomless anal sex between males</b>                      | <b>302</b> | <b>47.6</b> | -          | -           | <b>302</b> | <b>33.9</b> | -                |
| + Recipient of blood/blood product                            | 3          | 1.0         | -          | -           | 3          | 0.3         |                  |
| + Condomless vaginal sex                                      | 50         | 16.6        | -          | -           | 50         | 5.6         |                  |
| + Possible exposure in an HIV-endemic country                 | 5          | 1.7         | -          | -           | 5          | 0.6         |                  |
| + Occupational exposure                                       | 2          | 0.7         | -          | -           | 2          | 0.2         |                  |
| <b>Injection drug use</b>                                     | <b>126</b> | <b>19.9</b> | <b>67</b>  | <b>26.2</b> | <b>193</b> | <b>21.7</b> | <b>0.039</b>     |
| + Recipient of blood/blood product                            | 5          | 4.0         | 2          | 3.0         | 7          | 0.8         |                  |
| + Condomless vaginal sex                                      | 80         | 63.5        | 56         | 83.6        | 136        | 15.3        |                  |
| + Possible exposure in an HIV-endemic country                 | 1          | 0.8         | 0          | 0           | 1          | 0.1         |                  |
| + Occupational exposure                                       | 1          | 0.8         | 1          | 1.5         | 2          | 0.2         |                  |
| <b>Recipient of blood/blood product</b>                       | <b>18</b>  | <b>2.0</b>  | <b>8</b>   | <b>0.9</b>  | <b>26</b>  | <b>2.9</b>  | <b>0.248</b>     |
| + Condomless vaginal sex                                      | 11         | 61.1        | 6          | 75.0        | 17         | 1.9         |                  |
| + Possible exposure in an HIV-endemic country                 | 2          | 11.1        | 1          | 12.5        | 3          | 0.3         |                  |
| + Occupational exposure                                       | 1          | 5.6         | 2          | 25.0        | 3          | 0.3         |                  |
| <b>Condomless vaginal sex</b>                                 | <b>331</b> | <b>52.2</b> | <b>237</b> | <b>92.5</b> | <b>568</b> | <b>63.8</b> | <b>&lt;0.001</b> |
| + Possible exposure in an HIV-endemic country                 | 35         | 10.6        | 40         | 15.6        | 75         | 8.4         |                  |
| + Occupational exposure                                       | 2          | 0.6         | 4          | 1.7         | 6          | 0.7         |                  |
| <b>Occupational exposure</b>                                  | <b>5</b>   | <b>0.8</b>  | <b>4</b>   | <b>1.6</b>  | <b>9</b>   | <b>1.0</b>  | <b>0.285</b>     |
| + Possible exposure in an HIV-endemic country                 | 0          | 0           | 0          | 0           | 0          | 0           |                  |
| <b>Possible perinatal acquisition</b>                         | <b>1</b>   | <b>0.2</b>  | <b>0</b>   | <b>0</b>    | <b>1</b>   | <b>0.1</b>  | -                |
| + Possible exposure in an HIV-endemic country                 | 1          | 100         | -          | -           | 1          | 0.1         |                  |
| <b>Other/Unknown</b>                                          | <b>16</b>  | <b>2.5</b>  | <b>7</b>   | <b>2.7</b>  | <b>23</b>  | <b>2.6</b>  | <b>0.864</b>     |
| <b>Number of potential HIV exposures recorded</b>             |            |             |            |             |            |             |                  |
| 1                                                             | 446        | 70.4        | 151        | 59.0        | 597        | 67.1        |                  |
| 2                                                             | 172        | 27.1        | 102        | 39.8        | 274        | 30.8        | <0.001           |
| ≥3                                                            | 16         | 2.5         | 3          | 1.2         | 19         | 2.1         |                  |



1  
2  
3  
4  
5  
6  
7  
8  
9  
10  
11  
12  
13  
14  
15  
16  
17  
18  
19  
20  
21  
22  
23  
24  
25  
26  
27  
28  
29  
30  
31  
32  
33  
34  
35  
36  
37  
38  
39  
40  
41  
42  
43  
44  
45  
46  
47

\*Sum of categories exceeds total sample size because participants may have  $\geq 1$  HIV exposure category reported in clinical file.

For peer review only

### Acknowledgements

The authors thank Dr. Christopher Briggs, Dr. Elsabé du Plessis, Nicole Herpai, Stella Leung, Michael Paillé, and Dr. Souradet Shaw for their help with participant enrolment, data collection, and/or data analyses. This work would not be possible without the entire Manitoba HIV Program staff and providers – their support and tireless efforts throughout cohort development and participant recruitment continue to be invaluable. Finally, we also acknowledge and thank our partners at MHSAL’s Information Management & Analytics unit and Cadham Provincial Laboratory for their cooperation and support with administrative data extraction.

### Collaboration and data sharing statement

Researchers interested in accessing data related to the LHIV-Manitoba cohort should be directed to Dr. Marissa Becker ([marissa.becker@umanitoba.ca](mailto:marissa.becker@umanitoba.ca)). All access requests for individual-level data must be accompanied by proposals for the research projects and will be subject to approvals by Health Research Ethics Board at the University of Manitoba, as well as the researchers’ home institution. Aggregate and/or deidentified data may be shared with fewer restrictions pending review by the LHIV study team.

### Contributors

Study conceptualisation and design: LMM, EC, CEK, MLB. Data collection and acquisition: LMM, LI, KK, YK, MLB. Data analysis: LMM. Data interpretation: LMM, CEK, YK, JFB, MLB. Drafting of the manuscript: LMM. Critical revisions and final approval: EC, LI, CEK, CB, CL, YK, KK, JFB, MLB.

### Funding

The LHIV Study is funded by CIHR (funding reference no. TT5-128270). LMM received funding from the CIHR Canada Graduate Scholarship Doctoral Award, the University of Manitoba, and the Canadian Association for HIV Research to support this work.

### Competing interests

The authors have no competing interests to report.

## References

1. Haddad N, Li JS, Totten S, et al. HIV in Canada - Surveillance Report, 2017. *Canada Communicable Disease Report* 2018;44(12)
2. Government of Manitoba. 2017 Annual Statistical Update: HIV in Manitoba. Winnipeg: Manitoba Health, Seniors and Active Living, Epidemiology and Surveillance, 2018.
3. Government of Saskatchewan. HIV Prevention and Control Report 2017: Ministry of Health, Population Health Branch, 2018.
4. Bourgeois A, Edmunds M, Awan A, et al. HIV in Canada: Surveillance Report, 2016. *Canada Communicable Disease Report* 2017;43-12
5. Public Health Agency of Canada. HIV and AIDS in Canada: Surveillance Report to December 31, 2014. Ottawa: Minister of Public Works and Government Services Canada, 2015.
6. Becker ML, Kasper K, Pindera C, et al. Characterizing the HIV epidemic in the prairie provinces. *The Canadian journal of infectious diseases & medical microbiology = Journal canadien des maladies infectieuses et de la microbiologie medicale / AMMI Canada* 2012;23(1):19-22.
7. Heath K, Samji H, Nosyk B, et al. Cohort profile: Seek and treat for the optimal prevention of HIV/AIDS in British Columbia (STOP HIV/AIDS BC). *Int J Epidemiol* 2014;43(4):1073-81. doi: 10.1093/ije/dyu070 [published Online First: 2014/04/04]
8. Rourke SB, Gardner S, Burchell AN, et al. Cohort profile: the Ontario HIV Treatment Network Cohort Study (OCS). *Int J Epidemiol* 2013;42(2):402-11. doi: 10.1093/ije/dyr230 [published Online First: 2012/02/22]
9. Kendall CE, Shoemaker ES, Crowe L, et al. Engagement of people with lived experience in primary care research: Living with HIV Innovation Team Community Scholar Program. *Can Fam Physician* 2017;63(9):730-31. [published Online First: 2017/09/15]
10. Manitoba Centre for Health Policy. Concept: Administrative Health Data Winnipeg, Canada: University of Manitoba; 2010 [Available from: <http://mchp-appserv.cpe.umanitoba.ca/viewConcept.php?conceptID=1420> accessed July 15 2019.
11. Finlayson GS, Lix LM, Roos LL. The Whole is Greater than the Sum of the Parts: Using Data Linkage and Cohort Designs to Create Data Synergy at MCHP. *Healthcare Policy* 2011;6(Special Issue)
12. Manitoba HIV Program. 2016 Manitoba HIV Program Update. Winnipeg, 2017.
13. Manitoba HIV Program. 2017 Manitoba HIV Program Update. Winnipeg: Nine Circles Community Health Centre, 2018.
14. Public Health Agency of Canada. HIV and AIDS in Canada: Surveillance Report to December 31, 2013. Ottawa: Public Health Agency of Canada, 2014.
15. Schmidt MA, Mokotoff ED. HIV/AIDS surveillance and prevention: improving the characterization of HIV transmission. *Public health reports (Washington, DC : 1974)* 2003;118(3):197-204. doi: 10.1093/phr/118.3.197 [published Online First: 2003/05/27]
16. Government of Manitoba. 2016 Annual Statistical Update: HIV and AIDS. Winnipeg: Manitoba Health, Seniors and Active Living, 2018.
17. Shoemaker ES, Becker ML, Liddy CE, et al. Creating clinical cohorts: Challenges encountered in two Canadian provinces. *Healthcare Policy* 2019;In press
18. Manitoba Centre for Health Policy. Manitoba Population Research Data Repository - Overview Winnipeg, Canada: University of Manitoba; 2019 [Available from: [http://umanitoba.ca/faculties/health\\_sciences/medicine/units/chs/departamental\\_units/mchp/resources/repository/index.html](http://umanitoba.ca/faculties/health_sciences/medicine/units/chs/departamental_units/mchp/resources/repository/index.html) accessed 2 April 2019.

19. Roos LL, Nicol JP. A research registry: uses, development, and accuracy. *J Clin Epidemiol* 1999;52(1):39-47.
20. Wilton J, Broeckaert L. The HIV treatment cascade - patching the leaks to improve HIV prevention. Prevention in Focus. Toronto: CATIE, 2013.
21. Nosyk B, Montaner JS, Colley G, et al. The cascade of HIV care in British Columbia, Canada, 1996-2011: a population-based retrospective cohort study. *The Lancet Infectious diseases* 2014;14(1):40-9. doi: 10.1016/S1473-3099(13)70254-8
22. Gardner EM, Young B. The HIV care cascade through time. *The Lancet Infectious diseases* 2014;14(1):5-6. doi: 10.1016/s1473-3099(13)70272-x [published Online First: 2013/10/01]
23. Kendall CE, Shoemaker ES, Porter JE, et al. Canadian HIV Care Settings as Patient-Centered Medical Homes (PCMHs). *J Am Board Fam Med* 2019;32(2):158-67. doi: 10.3122/jabfm.2019.02.180231 [published Online First: 2019/03/10]
24. Byrd KK, Hou JG, Bush T, et al. Adherence and viral suppression among participants of the Patient-centered HIV Care Model project-a collaboration between community-based pharmacists and HIV clinical providers. LID - ciz276 [pii] LID - 10.1093/cid/ciz276 [doi]. (1537-6591 (Electronic))

1  
2  
3  
4  
5  
6  
7  
8  
9  
10  
11  
12  
13  
14  
15  
16  
17  
18  
19  
20  
21  
22  
23  
24  
25  
26  
27  
28  
29  
30  
31  
32  
33  
34  
35  
36  
37  
38  
39  
40  
41  
42  
43  
44  
45  
46  
47

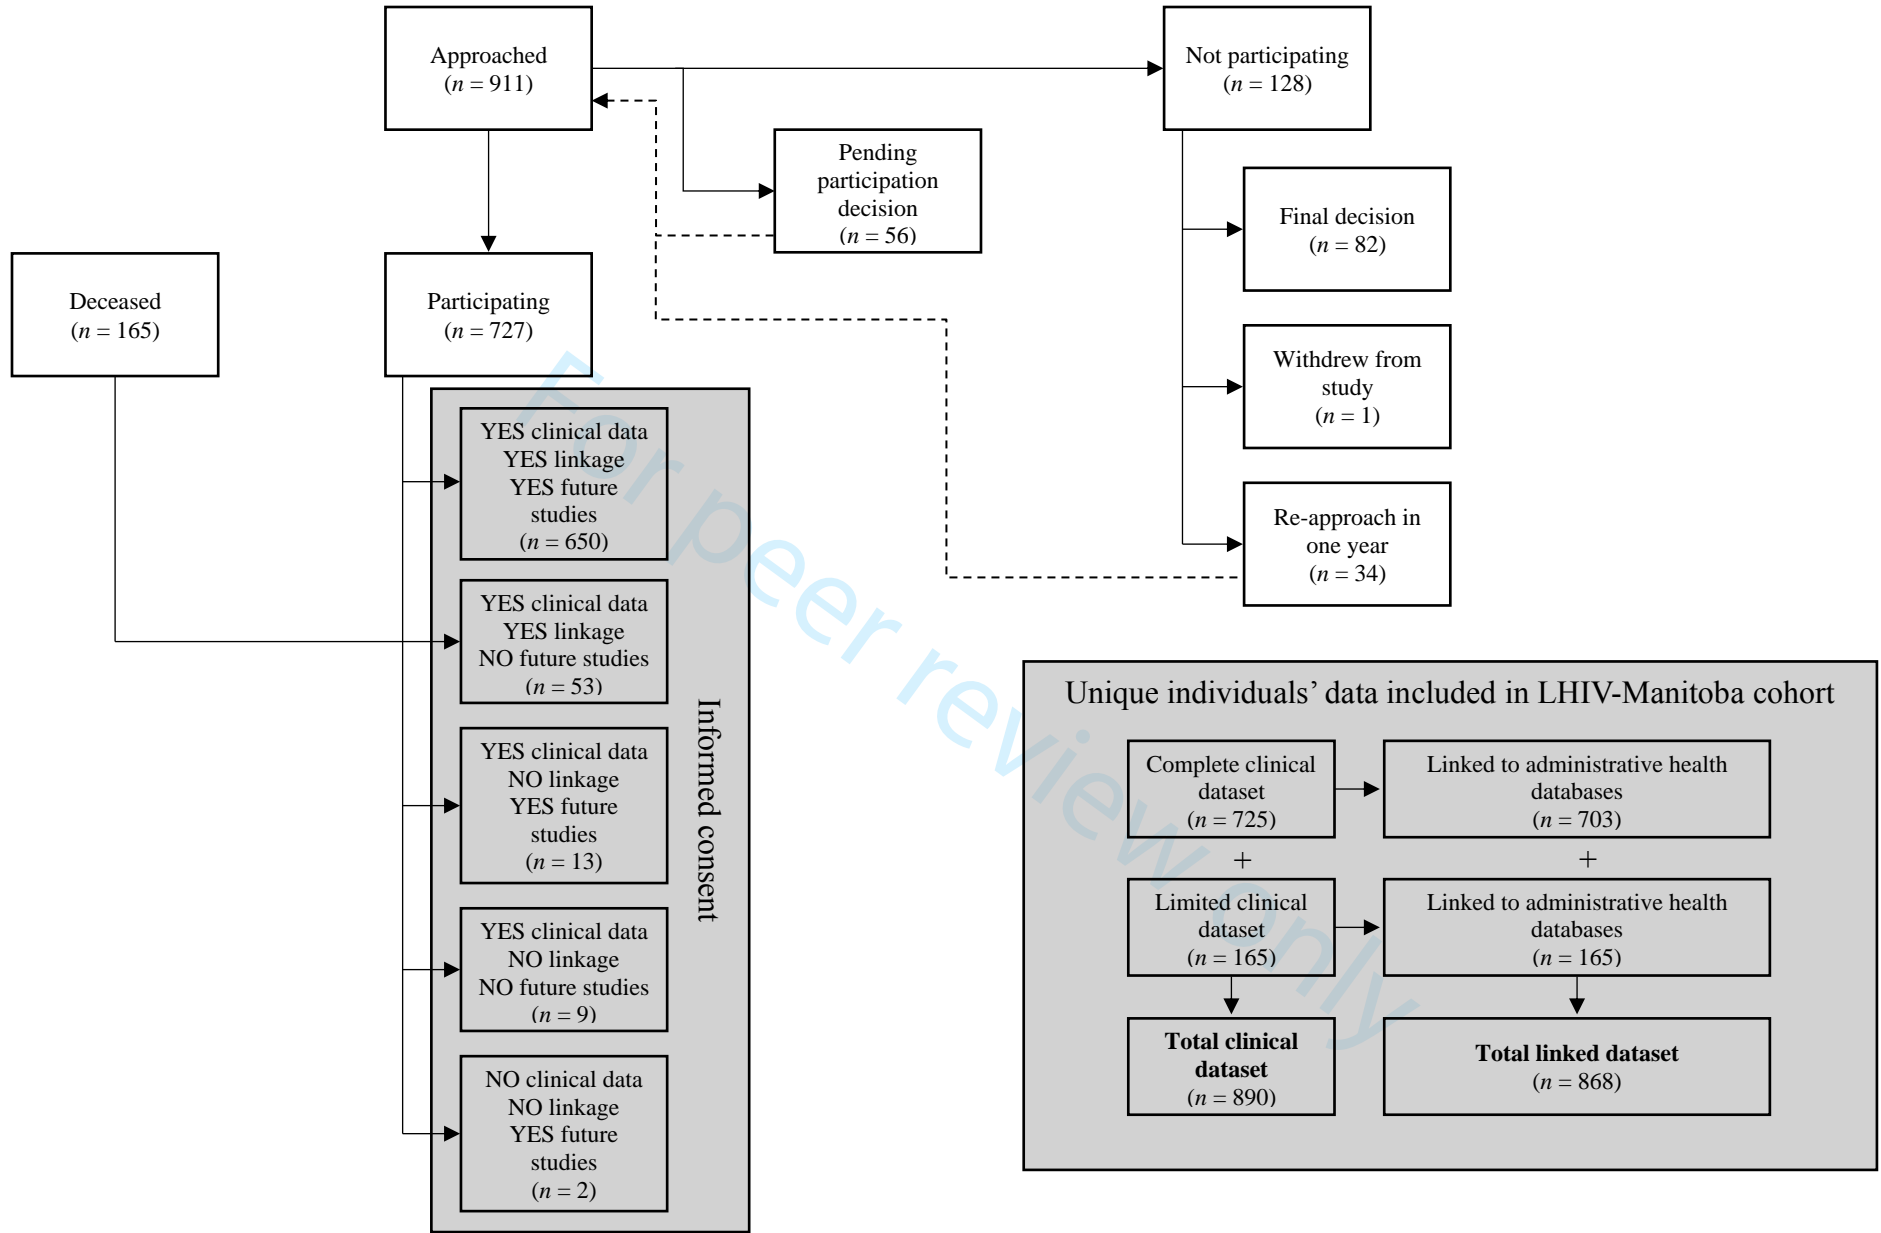

**Figure 1.** Recruitment, informed consent, and data collection processes for the LHIV-Manitoba cohort

STROBE Statement—Checklist of items that should be included in reports of *cohort studies*

|                              | Item No | Recommendation                                                                                                                                                                                                                                                                                                                                                                                                |
|------------------------------|---------|---------------------------------------------------------------------------------------------------------------------------------------------------------------------------------------------------------------------------------------------------------------------------------------------------------------------------------------------------------------------------------------------------------------|
| <b>Title and abstract</b>    | 1       | (a) Indicate the study's design with a commonly used term in the title or the abstract<br>(b) Provide in the abstract an informative and balanced summary of what was done and what was found                                                                                                                                                                                                                 |
| <b>Introduction</b>          |         |                                                                                                                                                                                                                                                                                                                                                                                                               |
| Background/rationale         | 2       | Explain the scientific background and rationale for the investigation being reported                                                                                                                                                                                                                                                                                                                          |
| Objectives                   | 3       | State specific objectives, including any prespecified hypotheses                                                                                                                                                                                                                                                                                                                                              |
| <b>Methods</b>               |         |                                                                                                                                                                                                                                                                                                                                                                                                               |
| Study design                 | 4       | Present key elements of study design early in the paper                                                                                                                                                                                                                                                                                                                                                       |
| Setting                      | 5       | Describe the setting, locations, and relevant dates, including periods of recruitment, exposure, follow-up, and data collection                                                                                                                                                                                                                                                                               |
| Participants                 | 6       | (a) Give the eligibility criteria, and the sources and methods of selection of participants. Describe methods of follow-up<br>(b) For matched studies, give matching criteria and number of exposed and unexposed                                                                                                                                                                                             |
| Variables                    | 7       | Clearly define all outcomes, exposures, predictors, potential confounders, and effect modifiers. Give diagnostic criteria, if applicable                                                                                                                                                                                                                                                                      |
| Data sources/<br>measurement | 8*      | For each variable of interest, give sources of data and details of methods of assessment (measurement). Describe comparability of assessment methods if there is more than one group                                                                                                                                                                                                                          |
| Bias                         | 9       | Describe any efforts to address potential sources of bias                                                                                                                                                                                                                                                                                                                                                     |
| Study size                   | 10      | Explain how the study size was arrived at                                                                                                                                                                                                                                                                                                                                                                     |
| Quantitative variables       | 11      | Explain how quantitative variables were handled in the analyses. If applicable, describe which groupings were chosen and why                                                                                                                                                                                                                                                                                  |
| Statistical methods          | 12      | (a) Describe all statistical methods, including those used to control for confounding<br>(b) Describe any methods used to examine subgroups and interactions<br>(c) Explain how missing data were addressed<br>(d) If applicable, explain how loss to follow-up was addressed<br>(e) Describe any sensitivity analyses                                                                                        |
| <b>Results</b>               |         |                                                                                                                                                                                                                                                                                                                                                                                                               |
| Participants                 | 13*     | (a) Report numbers of individuals at each stage of study—eg numbers potentially eligible, examined for eligibility, confirmed eligible, included in the study, completing follow-up, and analysed<br>(b) Give reasons for non-participation at each stage<br>(c) Consider use of a flow diagram                                                                                                               |
| Descriptive data             | 14*     | (a) Give characteristics of study participants (eg demographic, clinical, social) and information on exposures and potential confounders<br>(b) Indicate number of participants with missing data for each variable of interest<br>(c) Summarise follow-up time (eg, average and total amount)                                                                                                                |
| Outcome data                 | 15*     | Report numbers of outcome events or summary measures over time                                                                                                                                                                                                                                                                                                                                                |
| Main results                 | 16      | (a) Give unadjusted estimates and, if applicable, confounder-adjusted estimates and their precision (eg, 95% confidence interval). Make clear which confounders were adjusted for and why they were included<br>(b) Report category boundaries when continuous variables were categorized<br>(c) If relevant, consider translating estimates of relative risk into absolute risk for a meaningful time period |

|    |                          |    |                                                                                        |
|----|--------------------------|----|----------------------------------------------------------------------------------------|
| 1  | Other analyses           | 17 | Report other analyses done—eg analyses of subgroups and interactions, and              |
| 2  |                          |    | sensitivity analyses                                                                   |
| 3  |                          |    |                                                                                        |
| 4  | <b>Discussion</b>        |    |                                                                                        |
| 5  | Key results              | 18 | Summarise key results with reference to study objectives                               |
| 6  | Limitations              | 19 | Discuss limitations of the study, taking into account sources of potential bias or     |
| 7  |                          |    | imprecision. Discuss both direction and magnitude of any potential bias                |
| 8  |                          |    |                                                                                        |
| 9  | Interpretation           | 20 | Give a cautious overall interpretation of results considering objectives, limitations, |
| 10 |                          |    | multiplicity of analyses, results from similar studies, and other relevant evidence    |
| 11 | Generalisability         | 21 | Discuss the generalisability (external validity) of the study results                  |
| 12 |                          |    |                                                                                        |
| 13 | <b>Other information</b> |    |                                                                                        |
| 14 | Funding                  | 22 | Give the source of funding and the role of the funders for the present study and, if   |
| 15 |                          |    | applicable, for the original study on which the present article is based               |
| 16 |                          |    |                                                                                        |

17  
18 \*Give information separately for exposed and unexposed groups.

19  
20  
21 **Note:** An Explanation and Elaboration article discusses each checklist item and gives methodological background and  
22 published examples of transparent reporting. The STROBE checklist is best used in conjunction with this article (freely  
23 available on the Web sites of PLoS Medicine at <http://www.plosmedicine.org/>, Annals of Internal Medicine at  
24 <http://www.annals.org/>, and Epidemiology at <http://www.epidem.com/>). Information on the STROBE Initiative is  
25 available at <http://www.strobe-statement.org>.

26  
27  
28  
29  
30  
31  
32  
33  
34  
35  
36  
37  
38  
39  
40  
41  
42  
43  
44  
45  
46  
47  
48  
49  
50  
51  
52  
53  
54  
55  
56  
57  
58  
59  
60

# BMJ Open

## Cohort Profile: the LHIV-Manitoba clinical cohort of people living with HIV in Manitoba, Canada

|                                 |                                                                                                                                                                                                                                                                                                                                                                                                                                                                                                                                                                                                                                                                                                                                                                                                                                                                    |
|---------------------------------|--------------------------------------------------------------------------------------------------------------------------------------------------------------------------------------------------------------------------------------------------------------------------------------------------------------------------------------------------------------------------------------------------------------------------------------------------------------------------------------------------------------------------------------------------------------------------------------------------------------------------------------------------------------------------------------------------------------------------------------------------------------------------------------------------------------------------------------------------------------------|
| Journal:                        | <i>BMJ Open</i>                                                                                                                                                                                                                                                                                                                                                                                                                                                                                                                                                                                                                                                                                                                                                                                                                                                    |
| Manuscript ID                   | bmjopen-2019-034259.R1                                                                                                                                                                                                                                                                                                                                                                                                                                                                                                                                                                                                                                                                                                                                                                                                                                             |
| Article Type:                   | Cohort profile                                                                                                                                                                                                                                                                                                                                                                                                                                                                                                                                                                                                                                                                                                                                                                                                                                                     |
| Date Submitted by the Author:   | 06-Feb-2020                                                                                                                                                                                                                                                                                                                                                                                                                                                                                                                                                                                                                                                                                                                                                                                                                                                        |
| Complete List of Authors:       | McClarty, Leigh; University of Manitoba, Centre for Global Public Health, Department of Community Health Sciences<br>Cheuk, Eve; University of Manitoba, Centre for Global Public Health, Department of Community Health Sciences<br>Ireland, Laurie; Nine Circles Community Health Centre<br>Kendall, Claire; Elisabeth Bruyere Research Institute<br>Bibeau, Christine; Community Scholar<br>Loeppky, Carla; Government of Manitoba, Health, Seniors & Active Living<br>Kasper, Ken; University of Manitoba, Internal Medicine<br>Keynan, Yoav; University of Manitoba, Medical Microbiology and Infectious Diseases<br>Blanchard, James; University of Manitoba, Centre for Global Public Health, Department of Community Health Sciences<br>Becker, Marissa ; University of Manitoba, Centre for Global Public Health, Department of Community Health Sciences |
| <b>Primary Subject Heading</b>: | HIV/AIDS                                                                                                                                                                                                                                                                                                                                                                                                                                                                                                                                                                                                                                                                                                                                                                                                                                                           |
| Secondary Subject Heading:      | Epidemiology                                                                                                                                                                                                                                                                                                                                                                                                                                                                                                                                                                                                                                                                                                                                                                                                                                                       |
| Keywords:                       | HIV & AIDS < INFECTIOUS DISEASES, Epidemiology < INFECTIOUS DISEASES, Public health < INFECTIOUS DISEASES                                                                                                                                                                                                                                                                                                                                                                                                                                                                                                                                                                                                                                                                                                                                                          |
|                                 |                                                                                                                                                                                                                                                                                                                                                                                                                                                                                                                                                                                                                                                                                                                                                                                                                                                                    |

SCHOLARONE™  
Manuscripts





I, the Submitting Author has the right to grant and does grant on behalf of all authors of the Work (as defined in the below author licence), an exclusive licence and/or a non-exclusive licence for contributions from authors who are: i) UK Crown employees; ii) where BMJ has agreed a CC-BY licence shall apply, and/or iii) in accordance with the terms applicable for US Federal Government officers or employees acting as part of their official duties; on a worldwide, perpetual, irrevocable, royalty-free basis to BMJ Publishing Group Ltd ("BMJ") its licensees and where the relevant Journal is co-owned by BMJ to the co-owners of the Journal, to publish the Work in this journal and any other BMJ products and to exploit all rights, as set out in our [licence](#).

The Submitting Author accepts and understands that any supply made under these terms is made by BMJ to the Submitting Author unless you are acting as an employee on behalf of your employer or a postgraduate student of an affiliated institution which is paying any applicable article publishing charge ("APC") for Open Access articles. Where the Submitting Author wishes to make the Work available on an Open Access basis (and intends to pay the relevant APC), the terms of reuse of such Open Access shall be governed by a Creative Commons licence – details of these licences and which [Creative Commons](#) licence will apply to this Work are set out in our licence referred to above.

Other than as permitted in any relevant BMJ Author's Self Archiving Policies, I confirm this Work has not been accepted for publication elsewhere, is not being considered for publication elsewhere and does not duplicate material already published. I confirm all authors consent to publication of this Work and authorise the granting of this licence.

1  
2  
3 **Cohort Profile: the LHIV-Manitoba clinical cohort of people living with HIV in Manitoba,**  
4 **Canada**  
5

6 **AUTHORS**

7 Leigh M. McClarty, corresponding author

8 Centre for Global Public Health

9 R065 Medical Rehabilitation Building – 771 McDermot Ave.

10 University of Manitoba

11 Winnipeg, Manitoba R3E 0T6

12 Canada

13 ummcclar@myumanitoba.ca

14  
15  
16  
17 Eve Cheuk, eve.cheuk@gmail.com

18  
19 Laurie Ireland, lireland@ninecircles.ca

20  
21 Claire E. Kendall, ckendall@mail.uottawa.ca

22  
23 Christine Bibeau, christine.bibeau@yahoo.com

24  
25  
26 Carla Loeppky, carla.loepky@gov.mb.ca

27  
28 Ken Kasper, kkasper@hsc.mb.ca

29  
30 Yoav Keynan, yoav.keynan@umanitoba.ca

31  
32 James F. Blanchard, james\_blanchard@umanitoba.ca

33  
34  
35 Marissa L. Becker, marissa.becker@umanitoba.ca  
36  
37  
38  
39  
40  
41  
42  
43  
44  
45  
46  
47  
48  
49  
50  
51  
52  
53  
54  
55  
56  
57  
58  
59  
60

## ABSTRACT

**Purpose:** The LHIV-Manitoba cohort was developed as a way to provide a comprehensive source of HIV-related health information in the central Canadian Prairie province of Manitoba. The cohort will provide important information as we aim to better understand local HIV epidemiology and address key knowledge and practice gaps in HIV prevention, treatment, and care programming in the province.

**Participants:** In total, 890 individuals, aged 18 or older and living or receiving HIV care in Manitoba are enrolled in the cohort. A complete clinical dataset exists for 725 participants, which includes variables on socio-demographic characteristics, comorbidities and co-infections, self-reported HIV exposure categories, and HIV clinical indicators. A limited clinical dataset exists for an additional 165 individuals who were enrolled posthumously. 97.5% of cohort participants' clinical records are linked to provincial administrative health datasets.

**Findings to date:** The average age of cohort participants is 49.7 years. Approximately three-quarters of participants are male, 42% self-identified as white and 42% as Indigenous. The majority of participants (64%) reported condomless vaginal sex as a risk exposure for HIV. Nearly one-fifth (18%) of participants have an active HCV infection and the cohort's median CD4 count increased from 316 to 518 cells/mm<sup>3</sup> between time of entry into care to end of the first quarter in 2019.

**Future plans:** The LHIV-Manitoba cohort is an open cohort, and as such, participant enrolment, data collection, and analyses will be continually ongoing. Future analyses will focus on the impact of provincial drug plans on clinical outcomes, determinants of mortality among cohort participants, and deriving estimates for a local HIV care cascade.

## STRENGTHS AND LIMITATIONS OF THIS STUDY

- This cohort is the first comprehensive source of health data compiled from people living with HIV in Manitoba and will provide important opportunities for understanding clinical care needs, gaps, and outcomes of people living with HIV in the province.
- Cohort enrolment protocols are clinic-based, and as such, this cohort may not be representative of people living with HIV who are sub-optimally engaged in care. One key strategy to circumvent the misinterpretation of analyses derived from cohort data will be to involve Manitoba HIV Program clients and their providers in the analysis, interpretation, and knowledge translation processes.
- Because this cohort is embedded within the Manitoba HIV Program, and stakeholders within government and the community of people with lived experience are actively involved in its development, data from the cohort will be able to facilitate analyses to inform programming and provincial policy on adequately resourcing HIV-related health services.

**Word count:** 3,041

## INTRODUCTION

Annual reports on HIV in Canada consistently highlight heterogeneous, albeit relatively stable, epidemiological trends across the country.<sup>1</sup> At the end of 2016, the Public Health Agency of Canada (PHAC) estimated that 63,110 people were living with HIV in the country and 2,402 people were newly diagnosed in 2017.<sup>1</sup> Nationally, new HIV diagnoses disproportionately occur among Indigenous (First Nations, Inuit, and Métis) populations and people who have immigrated from countries where HIV is endemic.<sup>1</sup> The greatest proportion of prevalent HIV infections in nearly all Canadian provinces are attributed to condomless sex between men; however, notable exceptions include the central Prairie provinces of Saskatchewan and Manitoba, where most incident and prevalent cases are attributable to injection drug use and heterosexual transmission, respectively.<sup>2-4</sup> Rates of new HIV diagnoses per 100,000 population in Manitoba have been consistently higher than the national average, ranging from 9.5 new diagnoses in 2014 to 6.6 in 2016 and 2017.<sup>1 4 5</sup> Despite evidence of unique epidemiology and disproportionately high rates of infection, relatively little research addresses HIV epidemiology in the Canadian Prairies,<sup>6</sup> and there is a specific lack of published research focusing on Manitoba.

Current HIV epidemiological data for Manitoba are primarily derived from surveillance reports produced by PHAC and the provincial health department, Manitoba Health, Seniors and Active Living (MSHAL).<sup>1 2</sup> In 2017, MSHAL reported 89 new cases of HIV in the province with the majority of cases occurring in Winnipeg (81%) and a disproportionately high incidence among women when compared to national rates.<sup>2</sup> While useful for providing basic information about patterns and trends in HIV infection in Manitoba, these reports only provide aggregate-level demographic- and geographic analyses of the previous year's incident infections (new diagnoses and/or cases introduced to, but not acquired in, the province). Without clinical data, these reports are limited in their ability to inform specific research questions or programmatic decisions for HIV care and service delivery in the province.

In 2013, as part of a Canadian Institutes of Health Research-funded program of research, the “Advancing Primary Health Care for Persons Living with HIV in Canada” (LHIV) study provided support for the establishment of a prospective clinical cohort of people living with HIV in Manitoba. This clinical cohort is the first comprehensive source of HIV-specific health data in Manitoba and provides important opportunities to address key knowledge gaps in local HIV epidemiology—including patterns of healthcare utilisation and relevant clinical outcomes—and to understand healthcare needs of people living with HIV in the province. Similar cohorts have been developed and are now well-established in other Canadian provinces, including British Columbia<sup>7</sup> and Ontario.<sup>8</sup> This article provides an overview of processes and procedures involved in cohort development and maintenance, and describes demographic- and HIV-related characteristics of LHIV-Manitoba cohort participants.

## COHORT DESCRIPTION

### Study setting

Established in 2007, the Manitoba HIV Program is the primary provider of treatment, care, and support for people living with HIV in the province. The Manitoba HIV Program employs a multidisciplinary care model in which HIV specialist physicians, family physicians, nurses (including nurse practitioners), pharmacists, dietitians, social workers, and other allied service providers provide comprehensive HIV care out of three clinic sites—a hospital-based outpatient

1  
2  
3 clinic and a community health centre in Manitoba's capital city, Winnipeg, and a nurse-run  
4 health access centre in Brandon, a semi-urban city approximately 200 kilometres west of  
5 Winnipeg. While all three clinic sites follow a multidisciplinary care model and each have links  
6 to health promotion programs and resources, some differences in organization exist. For  
7 example, the clinic at the community health centre is run by family doctors and each client at that  
8 site is assigned to a specific physician and nurse couple. Meanwhile, physicians at the hospital-  
9 based clinic are Infectious Disease specialists and all clients of the hospital clinic in Winnipeg  
10 and the nurse-run clinic in Brandon are seen by a rotating roster of providers.  
11  
12

### 13 **Patient and Public Involvement**

14 Although arising from a research project, the LHIV-Manitoba cohort is strategically embedded  
15 within the Manitoba HIV Program and the local study team partners with stakeholders within the  
16 Manitoba HIV Program and other community clinics, MHSAL, the Manitoba First Nations  
17 AIDS Working Group, and the LHIV study's Community Scholar Program,<sup>9</sup> all of whom have  
18 been actively involved in the development of the cohort. Study design and enrolment procedures  
19 were conducted by researchers and trainees within the LHIV study team. Throughout the  
20 development of the cohort, engagement through community forums and meetings with key  
21 stakeholders provided information about the objectives of the LHIV-Manitoba cohort and what it  
22 meant to be a participant, while actively seeking input about research questions that could be  
23 addressed using cohort data. As such, findings from cohort data are expected to have direct  
24 relevance and applicability for both HIV care programming and provincial health policy.  
25 Dissemination and knowledge translation activities with all key stakeholders, including  
26 community members, community-based organisations, and key policy- and decision-makers, will  
27 be facilitated by study team members and Manitoba HIV Program staff.  
28  
29  
30  
31

### 32 **Ethical approval**

33 The LHIV-Manitoba cohort study received ethics approval from the University of Manitoba's  
34 Health Research Ethics Board, the local hospital's Research Impact Committee, and the Health  
35 Information Privacy Committee (HIPC) of MHSAL. This work has also received support from  
36 the Health Information Research Governance Committee of *Nanaandawewigamig*, the First  
37 Nations Health and Social Secretariat of Manitoba.  
38  
39

### 40 **Enrolment procedures**

41 Recruitment began at one clinic site in October 2013 and was fully implemented across all  
42 Manitoba HIV Program sites by January 2014. Data collection, linkage to administrative health  
43 databases, and data cleaning and analyses began in early 2017. Both enrolment and linkage are  
44 ongoing.  
45  
46

47 The enrolment process is illustrated in **Figure 1**. Inclusion criteria for the cohort are broad:  
48 participants must be at least 18 years of age and either living with HIV in Manitoba or receiving  
49 HIV care in Manitoba. Individuals who met these criteria but are under the jurisdiction of the  
50 Public Guardian and Trustee of Manitoba, or were otherwise unable to make decisions pertaining  
51 to their own healthcare, are deemed ineligible for participation in the cohort.  
52  
53

54 Recruitment and informed consent procedures take place within the Manitoba HIV Program  
55 clinics; clients who present to clinic are approached by a nurse or another allied healthcare  
56  
57  
58  
59

1  
2  
3 provider and asked whether they are willing to speak to a research assistant about participating in  
4 a research project. If a client is agreeable, a research assistant meets with them to explain the  
5 purpose, context, and methods for the LHIV-Manitoba cohort study, and reviews the informed  
6 consent form to determine whether the person is interested, willing, and able to participate.

7  
8 Participants have the opportunity to take part in any combination of three separate components of  
9 the LHIV-Manitoba cohort: (i) have their clinical data collected; and/or (ii) have their clinical  
10 data linked to administrative health data that is routinely collected by the province; and/or (iii)  
11 indicate interest in being approached about future HIV research studies. Clients who are not  
12 ready to decide immediately can defer their decision to participate in the cohort and request to  
13 meet with the research assistant at a later date to reconsider their participation. Study staff keep  
14 track of individuals who asked to defer their decision to participant and actively follow-up with  
15 them at their next clinic appointment in a year's time, depending on stated preference.  
16  
17

### 18 **Study measures, data sources, and data collection**

19 Clinical data are manually extracted from electronic medical records (EMR)—or from paper  
20 charts for data clinical information recorded prior to the introduction of EMR to clinic sites—  
21 within the Manitoba HIV Program's clinic sites by the first author and two trained extractors,  
22 and then entered into an encrypted, password protected Excel spreadsheet for consenting  
23 participants. Standardised definitions were developed for each variable to ensure quality and  
24 consistency of data abstracted from clinical records. Manitoba HIV Program clinicians who had  
25 entered data into clinical records were consulted for instances in which information to be  
26 collected was unclear or ambiguous. A complete clinical dataset for the LHIV-Manitoba cohort  
27 includes variables on participants' socio-demographic characteristics (age, sex, geographic  
28 location of residence, self-identified ethnicity), comorbid chronic- and mental health diagnoses,  
29 opportunistic- and other co-infections (occurring within 6-months of presentation to HIV care),  
30 including Hepatitis C virus (HCV); recorded HIV exposure categories; date and geographic  
31 location of first positive HIV test; CD4 count at time of diagnosis, at time of antiretroviral  
32 therapy (ART) initiation, and at the end of the second and fourth quarters of each year, beginning  
33 in 2017; date of first ART initiation; current ART regimen (collected biannually, beginning in  
34 2017); alcohol and drug use, including injection drug use; and type of prescription  
35 pharmaceutical insurance coverage (collected biannually, beginning in 2017).  
36  
37  
38  
39

40 The study's institutional ethics approvals also allow data from deceased clients of the Manitoba  
41 HIV Program to be collected via retrospective chart reviews. A limited dataset is extracted from  
42 clinical records of deceased individuals, which comprises a subset of the aforementioned clinical  
43 datasets, excluding all comorbidity and co-infection data from clinical records, except for HCV;  
44 treatment regimen data; and prescription pharmaceutical insurance data. Including data from  
45 deceased clients provides an important opportunity to explore and better understand determinants  
46 of mortality among people living with HIV in Manitoba. This has been identified as an area of  
47 particular interest to the Manitoba HIV Program, which, up to now, has not been adequately  
48 explored. Furthermore, the inclusion of these data helps to ensure broader generalizability of our  
49 findings from the cohort.  
50  
51

52 For individuals who were enrolled posthumously, and for participants who provide consent to  
53 data linkage, anonymized, de-identified clinical data are linked to provincial administrative  
54 health databases housed at MHSAL. Manitoba's administrative health datasets include  
55  
56  
57  
58  
59  
60

1  
2  
3 individual-level records for nearly all contacts with the provincial healthcare system, including  
4 physician visits, hospital admissions, pharmaceutical prescription dispensations, and laboratory  
5 testing.<sup>10</sup> Linkage between clinical and administrative datasets is done through matching an  
6 individual's unique Personal Health Identification Number (PHIN) within both datasets. Before  
7 linked datasets are returned to the study team, MHSAL scrambles PHINs to de-identify the  
8 datasets and maintain participant anonymity.<sup>11</sup>  
9  
10

### 11 **Characteristics of study participants**

12 As of March 31<sup>st</sup>, 2019, 890 unique individuals are included in the cohort (Figure 1). A complete  
13 clinical dataset exists for 725 (81.5%) cohort participants who agreed to have their data reviewed  
14 and extracted from clinical records within the Manitoba HIV Program. A limited clinical dataset  
15 exists for an additional 165 individuals whose clinical records were reviewed posthumously.  
16 Nearly all individual-level clinical data are also linked to provincial administrative health  
17 datasets ( $n=868$ , 97.5%). At the end of the first quarter of 2019, 676 cohort participants (76.0%)  
18 were alive and 214 (24.0%) were deceased.  
19  
20

21 Select sociodemographic characteristics and outcomes of cohort participants are presented in  
22 **Table 1** and compared to the larger Manitoba HIV Program client population. The average age  
23 of cohort participants at the end of the first quarter of 2019 (or at time of death, for participants  
24 who were deceased by March 31<sup>st</sup>, 2019), was  $49.7 \pm 11.9$  years. The majority of cohort  
25 participants are male (71.2%), over 80% reported being either white (42.4%) or Indigenous  
26 (41.6%), while an additional 10.9% self-identified as an ethnicity categorized as  
27 African/Caribbean/black. Geographic distribution of cohort participants is primarily concentrated  
28 in Winnipeg (80.8%), while 1.4% of cohort participants live outside of Manitoba.  
29  
30

### 31 **FINDINGS TO DATE**

32 Analyses from the LHIV-Manitoba cohort are ongoing; a summary of preliminary findings is  
33 provided below.  
34  
35

#### 36 **Representativeness and distribution of key outcomes within the LHIV-Manitoba cohort**

37 Given the research and programmatic potential of this cohort, it is of particular interest to  
38 understand whether, and to what extent, the demographic profile of cohort participants is  
39 representative of the larger Manitoba HIV Program client population (Table 1). Although similar  
40 in age structure, compared to the Manitoba HIV Program's client population, cohort participants  
41 are significantly more likely to be  $\geq 40$  years (78.9% vs. 70.0%,  $p < 0.05$ ). Compared to the  
42 Manitoba HIV Program, the cohort includes significantly more men (71.2% vs. 64.7%;  $p = 0.001$ )  
43 and individuals who self-identify as white (42.3% vs. 30.0%,  $p < 0.001$ ) or Indigenous (41.5% vs.  
44 33.0%,  $p < 0.001$ ) are greater in the LHIV-Manitoba cohort, while African/Caribbean/black  
45 clients are underrepresented (10.9% vs. 15.8%,  $p < 0.001$ ). The geographic distribution of cohort  
46 participants is similar to that of the larger client population, with the large majority of  
47 participants residing in Winnipeg (80.8% vs. 79.6%,  $p = 0.486$ ).  
48  
49  
50

#### 51 **HIV-specific clinical indicators, co-infections, and comorbidities**

52 Select clinical indicators, analysed by sex, are presented in **Table 2**. Preliminary findings from  
53 cohort participants' clinical data highlight similar trends to those seen in the most recent  
54 Manitoba HIV Program annual reports.<sup>12 13</sup> While a substantial proportion of cohort participants  
55  
56  
57  
58  
59  
60

presented late to HIV care, with 57.0% having initial CD4 counts  $\leq 350$  cells/mm<sup>3</sup>, 52.3% of most recent CD4 counts are  $>500$  cells/mm<sup>3</sup>. In general, the proportion of participants with suppressed viral loads ( $<200$  HIV RNA copies/mL) increased from their initial to most recent clinic visit (50.5% to 83.2%, respectively). Female cohort participants were significantly more likely than male participants to have unsuppressed viral loads (i.e.  $>200$  copies/mL) at presentation to care, but this same difference was not seen when analysing most recent viral load results. Opportunistic infections (OIs) were diagnosed at or within 6-months of presentation to HIV care among 29.1% of participants who were alive at enrolment, and 6.6% presented to care with  $\geq 2$  OIs. Prevalence of active HCV co-infection at enrolment is 17.5% among all participants, and slightly higher among female than male participants (19.9% vs. 16.6%). Two-fifths of participants had at least one comorbidity recorded in their clinical records, and 12.8% ( $n=93$ ) were living with at least two.

### HIV exposures among cohort participants

**Table 3** presents all self-reported HIV exposure categories recorded in participants' clinical files, analysed by sex. Although data in Table 3 are organized according to an HIV "risk hierarchy"—through which participants' primary risk exposure categories are assigned according to an established hierarchy of risk factors<sup>14</sup>—we report multiple exposure categories per individual in order to capture some of the complexity that can be missed with conventional hierarchy frameworks.<sup>15</sup> Notably, 41.0% of female participants reported at least two possible HIV exposure categories, while 29.6% of men reported the same. Similar to trends from annual surveillance reports in Manitoba,<sup>2 12 13 16</sup> condomless vaginal sex is the most commonly identified exposure category. Nearly half of male participants (47.6%) reported condomless anal sex with other men as a possible exposure, and 4.4% reported both condomless anal sex with men and injection drug use. The majority of female participants (92.6%) reported condomless vaginal sex as a possible exposure, and 26.2% reported injection drug use.

### STRENGTHS AND LIMITATIONS

Key limitations and challenges experienced throughout the development of the LHIV-Manitoba cohort, and the particular challenges associated with developing clinical cohorts using research dollars, have been described in detail elsewhere.<sup>17</sup> Briefly, a number participants expressed apprehension about the kinds of data that would be collected as a result of their involvement with the cohort, and in response, study staff made a point to spend adequate time to clearly explain the processes through which the study is able to link clinical and administrative data while maintaining confidentiality. Additionally, efficiently implementing study protocols without disrupting existing clinic operations was another substantial challenge; incorporating additional procedures related to cohort enrolment into routine encounters was difficult for healthcare providers who are working within busy HIV clinics. The study team regularly engages with providers to highlight the benefits that the cohort may confer to their own practice, their clients' needs, and the operations of Manitoba HIV Program.

Because enrolment protocols are clinic-based, this cohort may not be representative of people living with HIV who are sub-optimally engaged in care. As enrolment efforts move forward, it will be important for the study team to consider strategies to increase the proportion of participants belonging to demographic subgroups who are currently underrepresented in the cohort. It is of particular interest to the study team to understand whether certain subgroups are



1  
2  
3 less likely to consent to cohort participation, and if so why. While findings from the cohort will  
4 still be important for informing care programming and policy decisions for the province,  
5 generalizability may be limited, and results must be interpreted accordingly. One key strategy to  
6 circumvent the misinterpretation of analyses derived from cohort data will be to involve  
7 Manitoba HIV Program clients and their providers in the analysis, interpretation, and knowledge  
8 translation processes.  
9

10  
11 The LHIV-Manitoba cohort is the first comprehensive source of health data compiled from  
12 people living with HIV in the province and will provide important opportunities for  
13 systematically and comprehensively understanding clinical care needs, gaps, and outcomes of  
14 Manitobans living with HIV. Importantly, Manitoba is well-positioned to undertake large,  
15 population-based linkage studies given the existence of a single insurer (MHSAL) that is  
16 responsible for payment of most health services, and the existence of linkable, population-based  
17 administrative health databases through the Manitoba Centre for Health Policy.<sup>18 19</sup> The cohort  
18 also identifies common comorbidities such as diabetes and hypertension where further  
19 assessment of outcomes offers opportunities for targeted resource allocation for improved  
20 management. Furthermore, the Manitoba HIV Program embodies a unique care model—  
21 comprising both specialist and primary care services—that closely aligns with the Patient  
22 Centered Medical Home (PCMH) model of HIV care.<sup>20</sup> As such, findings from the LHIV-  
23 Manitoba cohort will be able to speak to the growing body of literature focusing on holistic  
24 models of HIV care delivery.<sup>20 21</sup>  
25  
26  
27

28 Finally, because the clinical cohort is embedded within the Manitoba HIV Program, and  
29 stakeholders within MHSAL and the community of people with lived experience have been  
30 actively involved in its development, we also expect that data from the cohort will facilitate  
31 epidemiological analyses that can inform both HIV care programming and provincial policy on  
32 adequately resourcing HIV-related health services.  
33  
34

### 35 **FUTURE PLANS**

36 Future analyses using clinical cohort data will focus on areas that have been identified as specific  
37 points of interest for the Manitoba HIV Program. Namely, generating a better understanding of  
38 the impact of existing provincial drug plans on clinical outcomes and exploring, for the first time  
39 in the province, characteristics and determinants of mortality among people living with HIV.  
40 Additionally, cohort data is currently being used to generate Manitoba-specific HIV care cascade  
41 estimates,<sup>22-24</sup> which will be presented in detail in a forthcoming manuscript. Subsequent work  
42 will examine the local HIV care cascade through an equity lens to better understand how  
43 different groups of participants experience HIV care and treatment outcomes differently within  
44 Manitoba.  
45  
46  
47  
48  
49  
50  
51  
52  
53  
54  
55  
56  
57  
58  
59  
60

**Table 1.** Sociodemographic characteristics and key outcomes of LHIV-Manitoba cohort participants, as compared to Manitoba HIV Program client population.

|                                                                       | LHIV-Manitoba cohort<br>(N=890) |      | Manitoba HIV Program<br>(N=1,357) |      | <i>p</i> -value |
|-----------------------------------------------------------------------|---------------------------------|------|-----------------------------------|------|-----------------|
|                                                                       | <i>n</i>                        | %    | <i>n</i>                          | %    |                 |
| <b>Age (years) on March 31<sup>st</sup>, 2019 or at time of death</b> |                                 |      |                                   |      |                 |
| <18                                                                   | 0                               | 0    | 2                                 | 0.2  | 0.245           |
| 18-24                                                                 | 10                              | 1.1  | 46                                | 3.4  | 0.001           |
| 25-39                                                                 | 178                             | 20.0 | 358                               | 26.4 | 0.001           |
| 40-64                                                                 | 621                             | 69.8 | 871                               | 64.2 | 0.006           |
| ≥65                                                                   | 81                              | 9.1  | 78                                | 5.8  | 0.003           |
| Mean (SD)                                                             | 49.7 (11.9)                     |      | 46.8 (12.1)                       |      | 0.000           |
| Median (IQR)                                                          | 49.8 (41.5-57.5)                |      | 46.9 (37.9-55.2)                  |      | 0.000           |
| <b>Sex</b>                                                            |                                 |      |                                   |      |                 |
| Male                                                                  | 634                             | 71.2 | 878                               | 64.7 | 0.001           |
| Female                                                                | 256                             | 28.8 | 478                               | 35.2 | 0.002           |
| <b>Self-identified ethnicity*</b>                                     |                                 |      |                                   |      |                 |
| White                                                                 | 376                             | 42.4 | 407                               | 36.2 | 0.000           |
| Indigenous (First Nations, Inuit, Métis)                              | 369                             | 41.6 | 448                               | 39.9 | 0.000           |
| Sub-Saharan African/Caribbean/black                                   | 97                              | 10.9 | 214                               | 19.1 | 0.001           |
| Other†                                                                | 44                              | 5.0  | 54                                | 4.8  | 0.307           |
| <b>Region of residence</b>                                            |                                 |      |                                   |      |                 |
| Winnipeg                                                              | 719                             | 80.8 | 1,080                             | 79.6 | 0.486           |
| Central and Eastern Manitoba                                          | 48                              | 5.4  | 71                                | 5.2  | 0.836           |
| Southern Manitoba                                                     | 37                              | 4.2  | 67                                | 4.9  | 0.440           |
| Western Manitoba                                                      | 35                              | 3.9  | 64                                | 4.7  | 0.365           |
| Northern Manitoba                                                     | 30                              | 3.4  | 46                                | 3.4  | 1.000           |
| Out of province                                                       | 12                              | 1.4  | 21                                | 1.6  | 0.705           |
| Unknown/No known address                                              | 9                               | 1.0  | 8                                 | 0.6  | 0.285           |
| <b>Drug coverage at March 31<sup>st</sup>, 2019‡</b>                  |                                 |      |                                   |      |                 |

|                                                                      |     |      |   |   |   |
|----------------------------------------------------------------------|-----|------|---|---|---|
| Out-of-pocket expenses associated with drug plan                     | 293 | 45.4 | - | - |   |
| No out-of-pocket expenses associated with drug plan                  | 346 | 53.6 | - | - | - |
| Not on treatment/Unknown                                             | 6   | 0.9  | - | - |   |
| <b>Problematic substance use recorded in clinic file<sup>§</sup></b> |     |      |   |   |   |
| Alcohol                                                              | 292 | 40.3 | - | - |   |
| Illegal or “street” drugs <sup>†</sup>                               | 222 | 31.6 | - | - | - |
| Alcohol and drugs                                                    | 148 | 21.1 | - | - |   |
| <b>Has a primary care practitioner<sup>§</sup></b>                   | 627 | 70.5 | - | - | - |

\*Sample sizes may not add up to total participants due to missing data for some variables.

<sup>†</sup>Includes Latin American, East/Southeast Asian, South Asian, West Asian/North African/Middle Eastern.

<sup>‡</sup>Variable only collected for participants alive in the fourth quarter of 2018 ( $n=645$ ).

<sup>§</sup>Variable only collected for participants alive at cohort enrolment ( $n=725$ ).

<sup>||</sup>Includes cocaine, crack cocaine, heroin, crystal methamphetamine, other hallucinogens (Lysergic acid diethylamide [LSD, “acid”],  $\gamma$ -Hydroxybutyric acid [GHB], ketamine, 3,4-Methylenedioxymethamphetamine [MDMA, “ecstasy”]), solvents, Talwin & Ritalin, and alkyl nitrates (“poppers”).

**Table 2.** HIV-specific and other clinical indicators among LHIV-Manitoba cohort participants, by sex.

|                                                                 | Male*<br>(N=634)      |      | Female*<br>(N=256)  |      | Total*<br>(N=890)     |      | p-value            |
|-----------------------------------------------------------------|-----------------------|------|---------------------|------|-----------------------|------|--------------------|
|                                                                 | n                     | %    | n                   | %    | n                     | %    |                    |
| <b>Initial CD4 count in Manitoba (cells/mm<sup>3</sup>)</b>     |                       |      |                     |      |                       |      |                    |
| <200                                                            | 211                   | 33.8 | 72                  | 28.7 | 283                   | 32.3 | 0.467              |
| 200-350                                                         | 151                   | 24.2 | 65                  | 25.9 | 216                   | 24.7 |                    |
| 351-500                                                         | 117                   | 18.8 | 47                  | 18.7 | 164                   | 18.7 |                    |
| >500                                                            | 145                   | 23.2 | 67                  | 26.7 | 212                   | 24.2 |                    |
| Mean (SD)                                                       | 328.2 (248.7)         |      | 370.5 (257.1)       |      | 340.3 (251.7)         |      |                    |
| Median (IQR)                                                    | 298.5 (116-478.5)     |      | 336 (179-517)       |      | 316 (129-492)         |      |                    |
| <b>Last CD4 count, up to end of 2018 (cells/mm<sup>3</sup>)</b> |                       |      |                     |      |                       |      |                    |
| <200                                                            | 81                    | 12.8 | 47                  | 18.6 | 128                   | 14.5 | 0.064              |
| 200-350                                                         | 88                    | 14.0 | 38                  | 15.0 | 126                   | 14.3 |                    |
| 351-500                                                         | 130                   | 20.6 | 38                  | 15.0 | 168                   | 19.0 |                    |
| >500                                                            | 332                   | 52.6 | 130                 | 51.4 | 462                   | 52.3 |                    |
| Mean (SD)                                                       | 589.3 (303.6)         |      | 331.7 (302.0)       |      | 542.2 (319.1)         |      |                    |
| Median (IQR)                                                    | 565 (384-768)         |      | 256 (99-472)        |      | 517.5 (309.5-735.5)   |      |                    |
| <b>Initial viral load (copies/mL)</b>                           |                       |      |                     |      |                       |      |                    |
| <200                                                            | 329                   | 54.7 | 100                 | 40.3 | 429                   | 50.5 | 0.001 <sup>†</sup> |
| 200-999                                                         | 27                    | 4.5  | 16                  | 6.5  | 43                    | 5.1  |                    |
| 1,000 – 99,999                                                  | 147                   | 24.5 | 90                  | 36.3 | 237                   | 27.9 |                    |
| 100,000 – 999,999                                               | 80                    | 13.3 | 36                  | 14.5 | 116                   | 13.7 |                    |
| ≥1,000,000                                                      | 18                    | 3.0  | 6                   | 2.4  | 24                    | 2.8  |                    |
| Mean (SD)                                                       | 125,778.7 (523,975.9) |      | 107,972 (340,114.2) |      | 120,577.2 (477,511.4) |      |                    |
| Median (IQR)                                                    | 60.9 (0-38,400)       |      | 1,875 (0-40,300)    |      | 170 (0-38,800)        |      |                    |
| <b>Last viral load, up to end of 2018 (copies/mL)</b>           |                       |      |                     |      |                       |      |                    |
| <200                                                            | 491                   | 84.4 | 190                 | 80.2 | 681                   | 83.2 | 0.517 <sup>†</sup> |
| 200-999                                                         | 22                    | 3.8  | 9                   | 3.8  | 31                    | 3.8  |                    |
| 1,000 – 99,999                                                  | 46                    | 7.9  | 28                  | 11.8 | 74                    | 9.0  |                    |

|                                                      |                    |      |                    |      |                      |      |        |
|------------------------------------------------------|--------------------|------|--------------------|------|----------------------|------|--------|
| 100,000 – 999,999                                    | 18                 | 3.1  | 8                  | 3.4  | 26                   | 3.2  |        |
| ≥1,000,000                                           | 5                  | 0.9  | 2                  | 0.8  | 7                    | 0.9  |        |
| Mean (SD)                                            | 40,972 (415,359.2) |      | 27,705 (171,693.3) |      | 37,133.2 (362,048.3) |      |        |
| Median (IQR)                                         | 0 (0-27.9)         |      | 0 (0-54.6)         |      | 0 (0-32.4)           |      |        |
| <b>Opportunistic infections (OI) ‡§</b>              |                    |      |                    |      |                      |      |        |
| None                                                 | 364                | 69.9 | 150                | 73.5 | 514                  | 70.9 |        |
| Oropharyngeal and/or esophageal candidiasis (thrush) | 108                | 20.7 | 39                 | 19.1 | 147                  | 20.3 |        |
| <i>Pneumocystis jirovecii</i> pneumonia (PJP)        | 56                 | 10.8 | 9                  | 4.4  | 65                   | 9.0  | 0.131† |
| Active tuberculosis                                  | 29                 | 5.6  | 14                 | 6.9  | 43                   | 5.9  |        |
| <i>Mycobacterium avium-intracellulare</i> (MAI)      | 7                  | 1.3  | 1                  | 0.5  | 8                    | 1.1  |        |
| Cryptococcal meningitis                              | 4                  | 0.8  | 1                  | 0.5  | 5                    | 0.7  |        |
| <b>Hepatitis C virus status at cohort enrolment</b>  |                    |      |                    |      |                      |      |        |
| No infection                                         | 496                | 78.2 | 182                | 71.1 | 678                  | 76.2 |        |
| Active infection (RNA+)                              | 105                | 16.6 | 51                 | 19.9 | 156                  | 17.5 | 0.085† |
| Past infection (RNA-/Ab+)                            | 32                 | 5.1  | 22                 | 8.6  | 54                   | 6.1  |        |
| Unknown                                              | 1                  | 0.2  | 1                  | 0.4  | 2                    | 0.2  |        |
| <b>Comorbidities ‡¶</b>                              |                    |      |                    |      |                      |      |        |
| None                                                 | 305                | 58.5 | 125                | 61.3 | 430                  | 59.3 |        |
| Asthma/COPD                                          | 93                 | 17.9 | 36                 | 17.7 | 129                  | 17.8 |        |
| Hypertension (HTN)                                   | 88                 | 16.9 | 24                 | 11.8 | 112                  | 15.5 | 0.006† |
| Type II diabetes (DM2)                               | 66                 | 12.7 | 39                 | 19.1 | 105                  | 14.5 |        |
| Coronary artery disease (CAD)                        | 33                 | 6.3  | 3                  | 1.5  | 36                   | 5.0  |        |

\*Sample sizes may not add up to total participants due to missing data for some variables.

†Some expected values <5, so *p*-values must be interpreted with caution.

‡Variable only collected for participants who were alive at cohort enrolment; Male, *n*=521; Female, *n*=204; Total, *n*=725.

§Diagnosed at, or within 6-months of presentation to care with the Manitoba HIV Program. Sum of categories exceeds total sample size because some participants presented with ≥1 OI.

¶Sum of categories exceeds total sample size because some participants presented with ≥1 comorbidity.

**Table 3.** Self-identified HIV exposure categories among LHIV-Manitoba cohort participants, by sex

|                                                               | Male*      |             | Female*    |             | Total      |             | p-value          |
|---------------------------------------------------------------|------------|-------------|------------|-------------|------------|-------------|------------------|
|                                                               | (N=634)    |             | (N=256)    |             | (N=890)    |             |                  |
|                                                               | n          | %           | n          | %           | n          | %           |                  |
| <b>Condomless anal sex between males + injection drug use</b> | <b>28</b>  | <b>4.4</b>  | -          | -           | <b>28</b>  | <b>3.1</b>  | -                |
| <b>Condomless anal sex between males</b>                      | <b>302</b> | <b>47.6</b> | -          | -           | <b>302</b> | <b>33.9</b> | -                |
| + Recipient of blood/blood product                            | 3          | 1.0         | -          | -           | 3          | 0.3         |                  |
| + Condomless vaginal sex                                      | 50         | 16.6        | -          | -           | 50         | 5.6         |                  |
| + Possible exposure in an HIV-endemic country <sup>†</sup>    | 5          | 1.7         | -          | -           | 5          | 0.6         |                  |
| + Occupational exposure                                       | 2          | 0.7         | -          | -           | 2          | 0.2         |                  |
| <b>Injection drug use</b>                                     | <b>126</b> | <b>19.9</b> | <b>67</b>  | <b>26.2</b> | <b>193</b> | <b>21.7</b> | <b>0.039</b>     |
| + Recipient of blood/blood product                            | 5          | 4.0         | 2          | 3.0         | 7          | 0.8         |                  |
| + Condomless vaginal sex                                      | 80         | 63.5        | 56         | 83.6        | 136        | 15.3        |                  |
| + Possible exposure in an HIV-endemic country <sup>†</sup>    | 1          | 0.8         | 0          | 0           | 1          | 0.1         |                  |
| + Occupational exposure                                       | 1          | 0.8         | 1          | 1.5         | 2          | 0.2         |                  |
| <b>Recipient of blood/blood product</b>                       | <b>18</b>  | <b>2.0</b>  | <b>8</b>   | <b>0.9</b>  | <b>26</b>  | <b>2.9</b>  | <b>0.248</b>     |
| + Condomless vaginal sex                                      | 11         | 61.1        | 6          | 75.0        | 17         | 1.9         |                  |
| + Possible exposure in an HIV-endemic country <sup>†</sup>    | 2          | 11.1        | 1          | 12.5        | 3          | 0.3         |                  |
| + Occupational exposure                                       | 1          | 5.6         | 2          | 25.0        | 3          | 0.3         |                  |
| <b>Condomless vaginal sex</b>                                 | <b>331</b> | <b>52.2</b> | <b>237</b> | <b>92.5</b> | <b>568</b> | <b>63.8</b> | <b>&lt;0.001</b> |
| + Possible exposure in an HIV-endemic country <sup>†</sup>    | 35         | 10.6        | 40         | 15.6        | 75         | 8.4         |                  |
| + Occupational exposure                                       | 2          | 0.6         | 4          | 1.7         | 6          | 0.7         |                  |
| <b>Occupational exposure</b>                                  | <b>5</b>   | <b>0.8</b>  | <b>4</b>   | <b>1.6</b>  | <b>9</b>   | <b>1.0</b>  | <b>0.285</b>     |
| + Possible exposure in an HIV-endemic country                 | 0          | 0           | 0          | 0           | 0          | 0           |                  |
| <b>Possible perinatal acquisition</b>                         | <b>1</b>   | <b>0.2</b>  | <b>0</b>   | <b>0</b>    | <b>1</b>   | <b>0.1</b>  | -                |
| + Possible exposure in an HIV-endemic country <sup>†</sup>    | 1          | 100         | -          | -           | 1          | 0.1         |                  |
| <b>Other/Unknown</b>                                          | <b>16</b>  | <b>2.5</b>  | <b>7</b>   | <b>2.7</b>  | <b>23</b>  | <b>2.6</b>  | <b>0.864</b>     |
| <b>Number of potential HIV exposures recorded</b>             |            |             |            |             |            |             |                  |
| 1                                                             | 446        | 70.4        | 151        | 59.0        | 597        | 67.1        |                  |
| 2                                                             | 172        | 27.1        | 102        | 39.8        | 274        | 30.8        | <0.001           |
| ≥3                                                            | 16         | 2.5         | 3          | 1.2         | 19         | 2.1         |                  |

1  
2  
3  
4  
5  
6  
7  
8  
9  
10  
11  
12  
13  
14  
15  
16  
17  
18  
19  
20  
21  
22  
23  
24  
25  
26  
27  
28  
29  
30  
31  
32  
33  
34  
35  
36  
37  
38  
39  
40  
41  
42  
43  
44  
45  
46  
47

\*Sum of categories exceeds total sample size because participants may have  $\geq 1$  HIV exposure category reported in clinical file.  
†Possible exposure in an HIV-endemic country is never assigned as a primary exposure category, but is captured as an additional exposure category if an individual was born in, or spent considerable time living/working in an HIV-endemic country and experienced a potentially “risky” event.

**FIGURE CAPTIONS**

**Figure 1.** Recruitment, informed consent, and data collection processes for the LHIV-Manitoba cohort.

For peer review only

### Acknowledgements

The authors thank Dr. Christopher Briggs, Dr. Elsabé du Plessis, Nicole Herpai, Stella Leung, Michael Paillé, and Dr. Souradet Shaw for their help with participant enrolment, data collection, and/or data analyses. This work would not be possible without the entire Manitoba HIV Program staff and providers – their support and tireless efforts throughout cohort development and participant recruitment continue to be invaluable. We also acknowledge and thank our partners at MHSAL's Information Management & Analytics unit and Cadham Provincial Laboratory for their collaboration and support with administrative data extraction. Finally, the support and guidance we have received from the LHIV Study team, especially the LHIV Community Scholars, and the advisory board at Nine Circles Community Health Centre have been invaluable to the continuation of this work.

### Collaboration and data sharing statement

Researchers interested in accessing data related to the LHIV-Manitoba cohort should be directed to Dr. Marissa Becker ([marissa.becker@umanitoba.ca](mailto:marissa.becker@umanitoba.ca)). All access requests for individual-level data must be accompanied by proposals for the research projects and will be subject to approvals by Health Research Ethics Board at the University of Manitoba, as well as the researchers' home institution. Aggregate and/or deidentified data may be shared with fewer restrictions pending review by the LHIV study team.

### Contributors

Study conceptualisation and design: LMM, EC, CEK, MLB. Data collection and acquisition: LMM, LI, KK, YK, MLB. Data analysis: LMM. Data interpretation: LMM, CEK, YK, JFB, MLB. Drafting of the manuscript: LMM. Critical revisions and final approval: EC, LI, CEK, CB, CL, YK, KK, JFB, MLB.

### Funding

The LHIV Study is funded by CIHR (funding reference no. TT5-128270). LMM received funding from the CIHR Canada Graduate Scholarship Doctoral Award, CIHR Michael Smith Foreign Study Supplement, the University of Manitoba, and the Canadian Association for HIV Research to support this work.

### Competing interests

The authors have no competing interests to report.



## References

1. Haddad N, Li JS, Totten S, et al. HIV in Canada - Surveillance Report, 2017. *Canada Communicable Disease Report* 2018;44(12)
2. Government of Manitoba. 2017 Annual Statistical Update: HIV in Manitoba. Winnipeg: Manitoba Health, Seniors and Active Living, Epidemiology and Surveillance, 2018.
3. Government of Saskatchewan. HIV Prevention and Control Report 2017: Ministry of Health, Population Health Branch, 2018.
4. Bourgeois A, Edmunds M, Awan A, et al. HIV in Canada: Surveillance Report, 2016. *Canada Communicable Disease Report* 2017;43-12
5. Public Health Agency of Canada. HIV and AIDS in Canada: Surveillance Report to December 31, 2014. Ottawa: Minister of Public Works and Government Services Canada, 2015.
6. Becker ML, Kasper K, Pindera C, et al. Characterizing the HIV epidemic in the prairie provinces. *The Canadian journal of infectious diseases & medical microbiology = Journal canadien des maladies infectieuses et de la microbiologie medicale / AMMI Canada* 2012;23(1):19-22.
7. Heath K, Samji H, Nosyk B, et al. Cohort profile: Seek and treat for the optimal prevention of HIV/AIDS in British Columbia (STOP HIV/AIDS BC). *Int J Epidemiol* 2014;43(4):1073-81. doi: 10.1093/ije/dyu070 [published Online First: 2014/04/04]
8. Rourke SB, Gardner S, Burchell AN, et al. Cohort profile: the Ontario HIV Treatment Network Cohort Study (OCS). *Int J Epidemiol* 2013;42(2):402-11. doi: 10.1093/ije/dyr230 [published Online First: 2012/02/22]
9. Kendall CE, Shoemaker ES, Crowe L, et al. Engagement of people with lived experience in primary care research: Living with HIV Innovation Team Community Scholar Program. *Can Fam Physician* 2017;63(9):730-31. [published Online First: 2017/09/15]
10. Manitoba Centre for Health Policy. Concept: Administrative Health Data Winnipeg, Canada: University of Manitoba; 2010 [Available from: <http://mchp-appserv.cpe.umanitoba.ca/viewConcept.php?conceptID=1420> accessed July 15 2019.
11. Finlayson GS, Lix LM, Roos LL. The Whole is Greater than the Sum of the Parts: Using Data Linkage and Cohort Designs to Create Data Synergy at MCHP. *Healthcare Policy* 2011;6(Special Issue)
12. Manitoba HIV Program. 2016 Manitoba HIV Program Update. Winnipeg, 2017.
13. Manitoba HIV Program. 2017 Manitoba HIV Program Update. Winnipeg: Nine Circles Community Health Centre, 2018.
14. Public Health Agency of Canada. HIV and AIDS in Canada: Surveillance Report to December 31, 2013. Ottawa: Public Health Agency of Canada, 2014.
15. Schmidt MA, Mokotoff ED. HIV/AIDS surveillance and prevention: improving the characterization of HIV transmission. *Public health reports (Washington, DC : 1974)* 2003;118(3):197-204. doi: 10.1093/phr/118.3.197 [published Online First: 2003/05/27]
16. Government of Manitoba. 2016 Annual Statistical Update: HIV and AIDS. Winnipeg: Manitoba Health, Seniors and Active Living, 2018.
17. Shoemaker ES, Becker ML, Liddy CE, et al. Creating clinical cohorts: Challenges encountered in two Canadian provinces. *Healthcare Policy* 2019;In press
18. Manitoba Centre for Health Policy. Manitoba Population Research Data Repository - Overview Winnipeg, Canada: University of Manitoba; 2019 [Available from: [http://umanitoba.ca/faculties/health\\_sciences/medicine/units/chs/departamental\\_units/mchp/resources/repository/index.html](http://umanitoba.ca/faculties/health_sciences/medicine/units/chs/departamental_units/mchp/resources/repository/index.html) accessed 2 April 2019.

- 1  
2  
3 19. Roos LL, Nicol JP. A research registry: uses, development, and accuracy. *J Clin Epidemiol*  
4 1999;52(1):39-47.  
5  
6 20. Kendall CE, Shoemaker ES, Porter JE, et al. Canadian HIV Care Settings as Patient-Centered  
7 Medical Homes (PCMHs). *J Am Board Fam Med* 2019;32(2):158-67. doi:  
8 10.3122/jabfm.2019.02.180231 [published Online First: 2019/03/10]  
9  
10 21. Byrd KK, Hou JG, Bush T, et al. Adherence and viral suppression among participants of the  
11 Patient-centered HIV Care Model project-a collaboration between community-based  
12 pharmacists and HIV clinical providers. LID - ciz276 [pii] LID - 10.1093/cid/ciz276  
13 [doi]. (1537-6591 (Electronic))  
14  
15 22. Wilton J, Broeckaert L. The HIV treatment cascade - patching the leaks to improve HIV  
16 prevention. *Prevention in Focus*. Toronto: CATIE, 2013.  
17  
18 23. Nosyk B, Montaner JS, Colley G, et al. The cascade of HIV care in British Columbia,  
19 Canada, 1996-2011: a population-based retrospective cohort study. *The Lancet Infectious*  
20 *diseases* 2014;14(1):40-9. doi: 10.1016/S1473-3099(13)70254-8  
21  
22 24. Gardner EM, Young B. The HIV care cascade through time. *The Lancet Infectious diseases*  
23 2014;14(1):5-6. doi: 10.1016/s1473-3099(13)70272-x [published Online First:  
24 2013/10/01]  
25  
26  
27  
28  
29  
30  
31  
32  
33  
34  
35  
36  
37  
38  
39  
40  
41  
42  
43  
44  
45  
46  
47  
48  
49  
50  
51  
52  
53  
54  
55  
56  
57  
58  
59  
60

1  
2  
3  
4  
5  
6  
7  
8  
9  
10  
11  
12  
13  
14  
15  
16  
17  
18  
19  
20  
21  
22  
23  
24  
25  
26  
27  
28  
29  
30  
31  
32  
33  
34  
35  
36  
37  
38  
39  
40  
41  
42  
43  
44  
45  
46  
47



**Figure 1.** Recruitment, informed consent, and data collection processes for the LHIV-Manitoba cohort

STROBE Statement—Checklist of items that should be included in reports of *cohort studies*

|                              | Item No | Recommendation                                                                                                                           | Page No. | Comment                                                                                                                                                                                                                                                                                          |
|------------------------------|---------|------------------------------------------------------------------------------------------------------------------------------------------|----------|--------------------------------------------------------------------------------------------------------------------------------------------------------------------------------------------------------------------------------------------------------------------------------------------------|
| <b>Title and abstract</b>    | 1       | (a) Indicate the study's design with a commonly used term in the title or the abstract                                                   | 1        | See Title                                                                                                                                                                                                                                                                                        |
|                              |         | (b) Provide in the abstract an informative and balanced summary of what was done and what was found                                      | 2        | See Abstract                                                                                                                                                                                                                                                                                     |
| <b>Introduction</b>          |         |                                                                                                                                          |          |                                                                                                                                                                                                                                                                                                  |
| Background/rationale         | 2       | Explain the scientific background and rationale for the investigation being reported                                                     | 3        | See Introduction section                                                                                                                                                                                                                                                                         |
| Objectives                   | 3       | State specific objectives, including any prespecified hypotheses                                                                         | 3        | Objectives of the cohort, and motivations for its development are outlined in the Introduction section. The cohort profile paper format outlined by BMJ Open does not require that hypotheses are explicitly stated, as this is not meant to be a paper focusing on analyses of the cohort data. |
| <b>Methods</b>               |         |                                                                                                                                          |          |                                                                                                                                                                                                                                                                                                  |
| Study design                 | 4       | Present key elements of study design early in the paper                                                                                  | 3-5      | This information is provided throughout the paper's Cohort Description section. See specifically the following sub-sections: Study setting; Ethical approval; Enrolment procedures; and Study measures, data sources, and data collection.                                                       |
| Setting                      | 5       | Describe the setting, locations, and relevant dates, including periods of recruitment, exposure, follow-up, and data collection          | 3-5      | This information is provided throughout the paper's Cohort Description section.                                                                                                                                                                                                                  |
| Participants                 | 6       | (a) Give the eligibility criteria, and the sources and methods of selection of participants. Describe methods of follow-up               | 4-5      | See specifically the Enrolment procedures and Study measures, data sources, and data collection sub-sections.                                                                                                                                                                                    |
|                              |         | (b) For matched studies, give matching criteria and number of exposed and unexposed                                                      | n/a      |                                                                                                                                                                                                                                                                                                  |
| Variables                    | 7       | Clearly define all outcomes, exposures, predictors, potential confounders, and effect modifiers. Give diagnostic criteria, if applicable | 5        | Variables included in the cohort are outlined in the first paragraph of the Study measures, data sources, and data collection sub-section. Key outcomes of interest are presented in Tables at the end of the paper.                                                                             |
| Data sources/<br>measurement | 8*      | For each variable of interest, give sources of data and details of methods of assessment (measurement).                                  | 5        | See Study measures, data sources, and data collection sub-section.                                                                                                                                                                                                                               |

1  
2  
3  
4  
5  
6  
7  
8  
9  
10  
11  
12  
13  
14  
15  
16  
17  
18  
19  
20  
21  
22  
23  
24  
25  
26  
27  
28  
29  
30  
31  
32  
33  
34  
35  
36  
37  
38  
39  
40  
41  
42  
43  
44  
45  
46

Describe comparability of assessment methods if there is more than one group

|                        |    |                                                                                                                              |     |                                                                                                                                                                                                                                                                       |
|------------------------|----|------------------------------------------------------------------------------------------------------------------------------|-----|-----------------------------------------------------------------------------------------------------------------------------------------------------------------------------------------------------------------------------------------------------------------------|
| Bias                   | 9  | Describe any efforts to address potential sources of bias                                                                    | 7   | Specifically, see the first two paragraphs of our Strengths and Limitations section.                                                                                                                                                                                  |
| Study size             | 10 | Explain how the study size was arrived at                                                                                    | n/a | Recruitment and enrolment procedures are detailed on page 4. This paper describes the development of an open cohort. While we provide information on the current number of participants in the cohort, enrolment is ongoing and as such, the “study size” is dynamic. |
| Quantitative variables | 11 | Explain how quantitative variables were handled in the analyses. If applicable, describe which groupings were chosen and why | n/a | BMJ Open specifically indicates that Cohort Profile papers should not include a description of analyses.                                                                                                                                                              |
| Statistical methods    | 12 | (a) Describe all statistical methods, including those used to control for confounding                                        | n/a | BMJ Open specifically indicates that Cohort Profile papers should not include a description of statistical analyses.                                                                                                                                                  |
|                        |    | (b) Describe any methods used to examine subgroups and interactions                                                          | n/a |                                                                                                                                                                                                                                                                       |
|                        |    | (c) Explain how missing data were addressed                                                                                  | n/a |                                                                                                                                                                                                                                                                       |
|                        |    | (d) If applicable, explain how loss to follow-up was addressed                                                               | n/a |                                                                                                                                                                                                                                                                       |
|                        |    | (e) Describe any sensitivity analyses                                                                                        | n/a |                                                                                                                                                                                                                                                                       |

**Results**

|                  |     |                                                                                                                                                                                                   |          |                                                                                                                                                                         |
|------------------|-----|---------------------------------------------------------------------------------------------------------------------------------------------------------------------------------------------------|----------|-------------------------------------------------------------------------------------------------------------------------------------------------------------------------|
| Participants     | 13* | (a) Report numbers of individuals at each stage of study—eg numbers potentially eligible, examined for eligibility, confirmed eligible, included in the study, completing follow-up, and analysed | 4        | These details are included in Figure 1, which is described in the second paragraph of the Enrolment procedures sub-section.                                             |
|                  |     | (b) Give reasons for non-participation at each stage                                                                                                                                              | 4        | See Enrolment procedures sub-section and refer to Figure 1.                                                                                                             |
|                  |     | (c) Consider use of a flow diagram                                                                                                                                                                | Figure 1 | Figure 1 attached as separate document, as per BMJ Open submission guidelines. Figure 1 title is included on page 14 of main document.                                  |
| Descriptive data | 14* | (a) Give characteristics of study participants (eg demographic, clinical, social) and information on exposures and potential confounders                                                          | 5-6      | See Characteristics of study participants sub-section and refer to Tables 1-3, included on pages 9-13 of the main document.                                             |
|                  |     | (b) Indicate number of participants with missing data for each variable of interest                                                                                                               | n/a      | We have not explicitly included this information in the main document because it is not relevant for a Cohort Profile paper. In the footnotes of our Tables, we do note |

|                   |     |                                                                                                                                                                                                              |      |                                                                                                                                                                                                                                             |
|-------------------|-----|--------------------------------------------------------------------------------------------------------------------------------------------------------------------------------------------------------------|------|---------------------------------------------------------------------------------------------------------------------------------------------------------------------------------------------------------------------------------------------|
|                   |     |                                                                                                                                                                                                              |      | which variables have some data missing, but we do not quantify missing data because the authors feel that it is outside the scope of this article and would not meaningfully contribute to our overall messaging.                           |
|                   |     | (c) Summarise follow-up time (eg, average and total amount)                                                                                                                                                  | n/a  | As per BMJ Open's guidelines for Cohort Profile papers, we have not provided details about our methods for analyses, and we do not present results from longitudinal analyses in this paper.                                                |
| Outcome data      | 15* | Report numbers of outcome events or summary measures over time                                                                                                                                               | n/a  |                                                                                                                                                                                                                                             |
| Main results      | 16  | (a) Give unadjusted estimates and, if applicable, confounder-adjusted estimates and their precision (eg, 95% confidence interval). Make clear which confounders were adjusted for and why they were included | n/a  |                                                                                                                                                                                                                                             |
|                   |     | (b) Report category boundaries when continuous variables were categorized                                                                                                                                    | 9-12 | Tables 1 and 2 present category boundaries for the following continuous variables: Age (Table 1), CD4 count, viral load (Table 2). The findings presented in these tables are discussed on pages 5-6.                                       |
|                   |     | (c) If relevant, consider translating estimates of relative risk into absolute risk for a meaningful time period                                                                                             | n/a  |                                                                                                                                                                                                                                             |
| Other analyses    | 17  | Report other analyses done—eg analyses of subgroups and interactions, and sensitivity analyses                                                                                                               | n/a  |                                                                                                                                                                                                                                             |
| <b>Discussion</b> |     |                                                                                                                                                                                                              |      |                                                                                                                                                                                                                                             |
| Key results       | 18  | Summarise key results with reference to study objectives                                                                                                                                                     | 6-8  | As per BMJ Open guidelines for Cohort Profile papers, we have provided a brief Findings to Date section, outlining preliminary analyses from the cohort. We also summarize our future analysis plans in the Future Plans section on page 8. |
| Limitations       | 19  | Discuss limitations of the study, taking into account sources of potential bias or imprecision. Discuss both direction and magnitude of any potential bias                                                   | 7-8  | See Strengths and Limitations section.                                                                                                                                                                                                      |
| Interpretation    | 20  | Give a cautious overall interpretation of results considering objectives, limitations, multiplicity of analyses, results from similar studies, and other relevant evidence                                   | 6-8  | This are briefly address in our Findings to Date and Strengths and Limitations sections.                                                                                                                                                    |

1  
2  
3  
4  
5  
6  
7  
8  
9  
10  
11  
12  
13  
14  
15  
16  
17  
18  
19  
20  
21  
22  
23  
24  
25  
26  
27  
28  
29  
30  
31  
32  
33  
34  
35  
36  
37  
38  
39  
40  
41  
42  
43  
44  
45  
46

|                          |    |                                                                                                                                                               |     |                                                                                                                                                                         |
|--------------------------|----|---------------------------------------------------------------------------------------------------------------------------------------------------------------|-----|-------------------------------------------------------------------------------------------------------------------------------------------------------------------------|
| Generalisability         | 21 | Discuss the generalisability (external validity) of the study results                                                                                         | 6-7 | This is addressed in the first sub-section of our Findings to Date section (page 6) and again in the second paragraph of the Strengths and Limitations section (page 7) |
| <b>Other information</b> |    |                                                                                                                                                               |     |                                                                                                                                                                         |
| Funding                  | 22 | Give the source of funding and the role of the funders for the present study and, if applicable, for the original study on which the present article is based | 15  |                                                                                                                                                                         |

\*Give information separately for exposed and unexposed groups.

**Note:** An Explanation and Elaboration article discusses each checklist item and gives methodological background and published examples of transparent reporting. The STROBE checklist is best used in conjunction with this article (freely available on the Web sites of PLoS Medicine at <http://www.plosmedicine.org/>, Annals of Internal Medicine at <http://www.annals.org/>, and Epidemiology at <http://www.epidem.com/>). Information on the STROBE Initiative is available at <http://www.strobe-statement.org>.
